# Supplementary material for: Cosmogenic 3 He chronology of postglacial lava flows at Mt. Ruapehu, New Zealand
Source: Copernicus journal article supplement (doi:10.5194/egusphere-2024-163), 2024-01-23
Supplement: Supplementary file 1 [file S2.1-magmatic-correction-data.xlsx]

## Sheet: Magmatic correction data
	Table - He isotopic measurement after in vacuum crushing of pyroxene/olivine phenocrysts (grain diameter : 100 to 1000 microns)
	CRPG, march 2024. Analysis by PH Blard		Ra = 1.39E-6
									1.95713e-06							Tube specific blank
	Sample name	Crushing duration	Mass (g)	3He (at/g)	1s	4He (at/g)	1s	3He/4He	1σ	3He/4He (Ra)	1σ	Weight	Weighted value			3He (at)	1s	4He (at)	1s
	MA-PD058	5 min crushing (500 strokes)	0.401	90366.2	25309.6	2.59255e+10	5.00818e+08	3.48562e-06	9.78564e-07	2.50764	1.4					18118.4	4534.22	3.08359e+09	8.8531e+07
	WG-PD326	3 min crushing (300 strokes)	0.49	43139.1	32795	Below detection limit	-	-								37746.7	10577.7	2.02636e+09	1.76298e+08
	WG-PD326	7 min crushing (700 strokes)	0.49	77034.1	28475.3	4.31523e+09	5.09247e+08	1.78517e-05	6.92691e-06	12.8429	4.98339					37746.7	10577.7	2.02636e+09	1.76298e+08
	DC-PD329	5 min crushing (500 strokes)	0.351	30111.3	19245.8	3.26306e+09	5.61351e+08	9.22794e-06	6.108e-06	6.63881	4.39424					6039.47	3020.51	8.81026e+07	8.8103e+07
	Patterson et al (1994) - analyses from fused samples
	Ohakune (clinopyroxenes)
	88206			Total 3He and 4He values can be found in Patterson et al (1994)				6.5e-06	2.4e-06	4.67626	1.72662
	Waimarino (olivines)
	88244a							8.93e-06	6.7e-06	6.42446	4.82014	0.0430408	0.276514
	88244b							8.96e-06	2.7e-06	6.44604	1.94245	0.265034	1.70842
	88244c							8.08e-06	2.8e-06	5.81295	2.01439	0.246441	1.43255
	88244 mean							8.6e-06	3.7e-06	6.163	1.3429	0.554516	3.41749
	Final ratio used						Uncertainty-weighted mean	5.9e-06	Obtained with IsoplotR (Vermeesch, 2018)				4.2446	Weighted mean in Ra
	(see file S4.2)						1σ	2.6e-06					1.8705	1σ in Ra
	Note 1: for the 1sigma value for ratio of sample MA058 (cell L5), we have used twice the analytical 1sigma (0.7), as we suspect that radiogenic contamination may impact on the true magmatic 4He value
	Note 2: The mean value of 8.6±3.7E-6 for the Waimarino samples was obtained as an uncertainty-weighted average using IsoplotR
