# Supplementary material for: Cosmogenic 3 He chronology of postglacial lava flows at Mt. Ruapehu, New Zealand
Source: Copernicus journal article supplement (doi:10.5194/egusphere-2024-163), 2024-01-23
Supplement: Supplementary file 3 [file S4-samples-data-He-measurements-and-non-cosmogenic-3He-corrections.xlsb.xlsx]

## Sheet: Data&Calculations
Sample	Lat	Long	Elevation	Surface dip	Dip direction	Shielding factor	Density (g/cm3)	Thickness (cm)	Scaling factor (Lal-Stone corrected)	P3 (at/g/y)	P3 1σ	P4 (at/g/y)	P4 1σ	P4/P3	1sigma P4/P3	3/4HeMAG	HeMAG 1σ	R factor	Rf 1σ	3Hetot	3Hetot 1σ	Pnuc	He closure age for 3Henuc (Ma)	3Henuc	1sigma3Henuc	4Hetot	4Hetot 1σ	Total 3He/4He (Ra)	1s 3He/4He	4He*(3/4HeMag)	1sig 4He*(3/4HeMag)	H	1sigmaH	3Hecos	3Hecos 1σ	3Hecos 2σ	3Hecos/3Hetot
SC-PD001	39.2143	175.601	1438.96			0.998149	1.89091	3.60981	2.83	346.052	34.9505	312822	31282.2	903.972	128.48	5.9e-06	2.6e-06	0.994667	0.00246955	3850000	278000	0.0405777	0.01	405.777	40.5777	51400000000	1150000000	53.8869	4.07355	303260	133812	3546740	308528	3.56576e+06	310309	620618	0.926171
SC-PD002	39.2143	175.601	1439.33			0.998149	2.01042	3.17036	2.82	344.83	34.827	312822	31282.2	907.178	128.936	5.9e-06	2.6e-06	0.994648	0.0024783	3590000	261000	0.0405777	0.01	405.777	40.5777	30300000000	765000000	85.2387	6.56007	178770	78909.2	3411230	272668	3.42959e+06	274268	548536	0.955317
SC-PD003	39.2146	175.6	1443.3			0.998149	2.01064	2.35345	2.82	344.83	34.827	312822	31282.2	907.178	128.936	5.9e-06	2.6e-06	0.994648	0.0024783	3450000	246000	0.0405777	0.01	405.777	40.5777	39100000000	854000000	63.4786	4.73389	230690	101785	3219310	266226	3.23663e+06	267780	535560	0.938155
SC-PD093	39.2115	175.614	1308.18	17	40	0.992567	2.3	2.59294	2.56	313.037	31.616	371386	37138.6	1186.4	168.621	5.9e-06	2.6e-06	0.993	0.0032411	2970000	218000	0.0537076	0.01	537.076	53.7076	9160000000	499000000	233.263	21.322	54044	23997.3	2915956	219317	2.93651e+06	221071	442141	0.988724
WP-PD007	39.2479	175.588	1911.73	10	190	0.996085	2.13253	3.2475	4.02	491.566	49.647	608461	60846.1	1237.8	175.927	5.9e-06	2.6e-06	0.992697	0.00338153	5630000	227000	0.0414497	0.01	414.497	41.4497	20600000000	742000000	196.619	10.6303	121540	53738.6	5508460	233274	5.54898e+06	235749	471499	0.98561
WP-PD008	39.2479	175.588	1912.06	18	30	0.995222	2.06228	3.02294	3.99	487.897	49.2765	608461	60846.1	1247.11	177.25	5.9e-06	2.6e-06	0.992642	0.00340695	5220000	222000	0.0414497	0.01	414.497	41.4497	19400000000	342000000	193.577	8.91185	114460	50480.3	5105540	227667	5.14338e+06	230033	460066	0.985323
BR-PD014	39.2201	175.541	1360.02			0.999203	2.15385	2.7298	2.6	317.928	32.11	75434.5	7543.45	237.269	33.7227	5.9e-06	2.6e-06	0.9986	0.000648192	2330000	124000	0.0564766	0.01	564.766	56.4766	6060000000	482000000	276.61	26.4717	35754	16010.6	2294246	125029	2.29746e+06	125214	250427	0.986035
BR-PD016	39.2198	175.538	1359.23	28	55	0.981487	2.32184	2.63267	2.62	320.374	32.357	75434.5	7543.45	235.458	33.4653	5.9e-06	2.6e-06	0.998611	0.000643244	2570000	135000	0.0564766	0.01	564.766	56.4766	14500000000	617000000	127.512	8.61999	85550	37875.3	2484450	140212	2.48791e+06	140417	280833	0.968057
BR-PD017	39.219	175.541	1332.59			0.998016	2.25134	2.70558	2.56	313.037	31.616	75434.5	7543.45	240.977	34.2497	5.9e-06	2.6e-06	0.998578	0.00065832	2470000	139000	0.0564766	0.01	564.766	56.4766	16500000000	770000000	107.696	7.87335	97350	43139.9	2372650	145541	2.37603e+06	145756	291512	0.961955
BR-PD018	39.219	175.541	1332.43			0.998103	2.14737	4.32904	2.6	317.928	32.11	75434.5	7543.45	237.269	33.7227	5.9e-06	2.6e-06	0.9986	0.000648192	2870000	161000	0.0564766	0.01	564.766	56.4766	11400000000	788000000	181.118	16.1235	67260	30002.4	2802740	163772	2.80667e+06	164011	328023	0.977933
GR-PD022	39.3072	175.561	2147.99			0.995707	2.33333	6.01168	4.82	589.39	59.527	44271.4	11067.9	75.114	20.253	5.9e-06	2.6e-06	0.999557	0.000228952	7860000	210000	0.0253775	0.02	507.549	50.7549	12400000000	979000000	456.022	38.0094	73160	32753.3	7786840	212539	7.79029e+06	212641	425281	0.991131
GR-PD023	39.3074	175.562	2147.25	45	180	0.920611	2.2381	4.46078	4.78	584.498	59.033	44271.4	11067.9	75.7426	20.4225	5.9e-06	2.6e-06	0.999553	0.000230868	7610000	493000	0.0253775	0.02	507.549	50.7549	11900000000	1320000000	460.069	59.0989	70210	31905.1	7539790	494031	7.54316e+06	494255	988511	0.991217
GR-PD024	39.3074	175.562	2145.37			0.990045	2.17582	4.60611	4.7	574.716	58.045	44271.4	11067.9	77.0318	20.7701	5.9e-06	2.6e-06	0.999546	0.000234798	6190000	388000	0.0253775	0.02	507.549	50.7549	12800000000	742000000	347.909	29.7037	75520	33566.7	6114480	389449	6.11726e+06	389629	779258	0.988249
GR-PD025	39.3078	175.561	2128.1			0.99253	2.8	4.7235	4.41	539.255	54.4635	44271.4	11067.9	82.0974	22.136	5.9e-06	2.6e-06	0.999516	0.000250238	3610000	245000	0.0253775	0.02	507.549	50.7549	18700000000	975000000	138.884	11.886	110330	48959.1	3499670	249844	3.50137e+06	249967	499933	0.969907
RT-PD027	39.314	175.551	1831.43			0.996664	1.83811	5.47611	3.83	468.332	47.3005	74371.9	7437.19	158.801	22.5702	5.9e-06	2.6e-06	0.999063	0.000433827	6380000	252000	0.0295791	0.015	443.687	44.3687	17400000000	773000000	263.789	15.681	102660	45469.3	6277340	256069	6.28323e+06	256324	512648	0.984832
RT-PD028	39.314	175.551	1833.06			0.996378	1.78986	5.33429	3.82	467.11	47.177	74371.9	7437.19	159.217	22.6293	5.9e-06	2.6e-06	0.999061	0.000434963	5730000	258000	0.0295791	0.015	443.687	44.3687	21300000000	1160000000	193.535	13.6758	125670	55801.3	5604330	263965	5.6096e+06	264225	528450	0.978988
RT-PD029	39.314	175.551	1832.92			0.996378	1.83811	5.32946	3.84	469.555	47.424	74371.9	7437.19	158.388	22.5115	5.9e-06	2.6e-06	0.999066	0.000432697	6420000	363000	0.0295791	0.015	443.687	44.3687	22400000000	1760000000	206.192	19.9597	132160	59158.5	6287840	367789	6.29372e+06	368143	736286	0.98033
RT-PD030	39.3143	175.551	1816.39	20	230	0.988054	1.88636	5.04964	3.81	465.887	47.0535	74371.9	7437.19	159.635	22.6887	5.9e-06	2.6e-06	0.999058	0.000436104	6450000	306000	0.0295791	0.015	443.687	44.3687	9790000000	560000000	473.982	35.224	57761	25667.5	6392239	307075	6.39827e+06	307377	614754	0.991979
RT-PD045	39.3234	175.552	1585.95	20	80	0.991255	2.8	4.23172	3.27	399.856	40.3845	74454.8	7445.48	186.204	26.465	5.9e-06	2.6e-06	0.998901	0.000508688	6300000	378000	0.0400594	0.015	600.891	60.0891	18300000000	665000000	247.671	17.3732	107970	47741.5	6192030	381003	6.19884e+06	381435	762870	0.983943
RT-PD046-a	39.3249	175.551	1567.56	29	145	0.978587	2.07087	3.61406	3.23	394.964	39.8905	74454.8	7445.48	188.51	26.7927	5.9e-06	2.6e-06	0.998888	0.000514988	6140000	245000	0.0400594	0.015	600.891	60.0891	7350000000	514000000	600.989	48.3886	43365	19349.1	6096635	245763	6.10342e+06	246057	492113	0.994043
RT-PD046-b	39.3249	175.551	1567.56	29	145	0.978587	2.07087	3.61406	3.22	393.742	39.767	74454.8	7445.48	189.096	26.8759	5.9e-06	2.6e-06	0.998884	0.000516587	5980000	303000	0.0400594	0.015	600.891	60.0891	9830000000	818000000	437.656	42.6395	57997	26009.7	5922003	304114	5.92862e+06	304469	608939	0.991408
RT-PD046-M	39.3249	175.551	1567.56	29	145	0.978587	2.07087	3.61406	3.22	393.742	39.767	74454.8	7445.48	189.096	26.8759	5.9e-06	2.6e-06	0.998884	0.000516587															6.04154e+06	266736	533472
RT-PD047	39.3251	175.55	1567.39			0.997456	2.2716	3.03016	3.21	392.519	39.6435	74454.8	7445.48	189.685	26.9596	5.9e-06	2.6e-06	0.998881	0.000518197	5910000	288000	0.0400594	0.015	600.891	60.0891	11300000000	620000000	376.265	27.6116	66670	29606.8	5843330	289518	5.84988e+06	289858	579716	0.989827
RT-PD048	39.325	175.55	1567.29			0.997456	2.18868	3.37521	3.06	374.177	37.791	74454.8	7445.48	198.983	28.2812	5.9e-06	2.6e-06	0.998826	0.000543598	3080000	156000	0.0400594	0.015	600.891	60.0891	16400000000	682000000	135.111	8.85439	96760	42829.4	2983240	161773	2.98675e+06	161971	323942	0.969723
NR-PD053	39.3381	175.587	1369.76	15	3	0.995825	2.38938	4.83258	2.94	359.503	36.309	101036	10103.6	281.043	39.9443	5.9e-06	2.6e-06	0.998342	0.000767777	16200000	670000	0.0654239	0.045	2944.07	294.407	24600000000	844000000	473.767	25.4585	145140	64153.6	16054860	673064	1.60815e+07	674296	1.34859e+06	0.992687		1.60815e+07
NR-PD054	39.3384	175.588	1372.88			0.999856	2.06098	4.20833	2.95	360.726	36.4325	101036	10103.6	280.09	39.8088	5.9e-06	2.6e-06	0.998347	0.000765174	15300000	633000	0.0654239	0.045	2944.07	294.407	18900000000	653000000	582.391	31.392	111510	49290.8	15188490	634916	1.52136e+07	636074	1.27215e+06	0.994355		1.52136e+07
NR-PD055	39.3384	175.588	1372.47			0.999432	2.15094	3.21689	2.93	358.28	36.1855	101036	10103.6	282.002	40.0806	5.9e-06	2.6e-06	0.998336	0.000770397	14600000	618000	0.0654239	0.045	2944.07	294.407	17900000000	773000000	586.793	35.4833	105610	46762.9	14494390	619767	1.45185e+07	620901	1.2418e+06	0.994421		1.45185e+07
NR-PD057	39.3384	175.588	1372.58			0.995308	2.46721	3.49706	2.94	359.503	36.309	101036	10103.6	281.043	39.9443	5.9e-06	2.6e-06	0.998342	0.000767777	14800000	624000	0.0654239	0.045	2944.07	294.407	26100000000	951000000	407.95	22.733	153990	68091.6	14646010	627704	1.46703e+07	628848	1.2577e+06	0.991239		1.46703e+07
MA-PD058	39.3125	175.612	1570.71	14	190	0.996354	2.45342	2.88062	3.39	414.529	41.8665	129146	12914.6	311.549	44.2801	5.9e-06	2.6e-06	0.998162	0.000851116	20000000	831000	0.0817794	0.05	4088.97	408.897	48200000000	1460000000	298.516	15.3494	284380	125616	19715620	840441	1.97519e+07	842157	1.68431e+06	0.987596		1.97519e+07
MA-PD059	39.3125	175.612	1569.32			0.997705	2.20833	3.19481	3.34	408.415	41.249	129146	12914.6	316.213	44.9429	5.9e-06	2.6e-06	0.998134	0.000863857	24100000	1180000	0.0817794	0.05	4088.97	408.897	95600000000	2710000000	181.361	10.2608	564040	249074	23535960	1.206e+06	2.358e+07	1.20843e+06	2.41685e+06	0.978421		2.358e+07
MF-PD061	39.3169	175.514	1437.04			0.970758	2.15238	3.02573	2.89	353.389	35.6915	114222	11422.2	323.22	45.9388	5.9e-06	2.6e-06	0.998093	0.000882999	4920000	263000	0.072901	0.013	947.713	94.7713	19300000000	731000000	183.397	12.015	113870	50365	4806130	267779	4.81531e+06	268325	536649	0.978722
MF-PD063	39.3168	175.515	1434.84			0.991208	1.8125	3.77465	2.85	348.498	35.1975	114222	11422.2	327.756	46.5835	5.9e-06	2.6e-06	0.998066	0.000895392	4000000	223000	0.072901	0.013	947.713	94.7713	21900000000	931000000	131.402	9.21245	129210	57204.3	3870790	230220	3.87829e+06	230692	461385	0.969572
MF-PD064	39.3167	175.515	1433.79	11	180	0.987327	1.94595	3.57218	2.86	349.721	35.321	114222	11422.2	326.61	46.4207	5.9e-06	2.6e-06	0.998073	0.000892261	4080000	216000	0.072901	0.013	947.713	94.7713	16500000000	650000000	177.894	11.7392	97350	43071.1	3982650	220252	3.99034e+06	220706	441413	0.978024
MF-PD065	39.3167	175.515	1433.29			0.987978	1.80172	2.595	2.87	350.944	35.4445	114222	11422.2	325.472	46.2589	5.9e-06	2.6e-06	0.99808	0.000889152	4470000	244000	0.072901	0.013	947.713	94.7713	17900000000	792000000	179.655	12.6237	105610	46774	4364390	248443	4.37279e+06	248951	497902	0.978252
TC-PD066	39.3014	175.519	1533.19			0.997377	2.16509	6.22944	3.07	375.4	37.9145	75863.9	7586.39	202.088	28.7225	5.9e-06	2.6e-06	0.998808	0.000552081	4130000	205000	0.0292497	0.013	380.246	38.0246	10300000000	637000000	288.468	22.8757	60770	27042.4	4069230	206776	4.07409e+06	207035	414070	0.986462
TC-PD067	39.3015	175.519	1533.56			0.997377	2.11207	4.46456	3.1	379.068	38.285	75863.9	7586.39	200.133	28.4446	5.9e-06	2.6e-06	0.998819	0.000546739	5240000	257000	0.0292497	0.013	380.246	38.0246	11400000000	470000000	330.683	21.1876	67260	29769.4	5172740	258718	5.17886e+06	259040	518080	0.988331
TC-PD068	39.3015	175.519	1533.09			0.997377	2.14516	7.41329	3.09	377.845	38.1615	75863.9	7586.39	200.78	28.5366	5.9e-06	2.6e-06	0.998815	0.000548508	4740000	228000	0.0292497	0.013	380.246	38.0246	10900000000	372000000	312.851	18.4515	64310	28424.9	4675690	229765	4.68124e+06	230052	460104	0.987602
TC-PD070	39.3012	175.519	1528			0.997377	1.9871	4.32687	3.08	376.622	38.038	75863.9	7586.39	201.432	28.6293	5.9e-06	2.6e-06	0.998812	0.000550289	4890000	232000	0.0292497	0.013	380.246	38.0246	8170000000	350000000	430.598	27.5251	48203	21342.1	4841797	232980	4.84756e+06	233272	466544	0.991321
WT-PD073	39.2569	175.543	1892.38	20	260	0.986899	2.08556	3.53265	3.98	486.674	49.153	154076	15407.6	316.589	44.9964	5.9e-06	2.6e-06	0.998132	0.000864885	6010000	283000	0.049317	0.013	641.121	64.1121	3520000000	752000000	1228.34	268.716	20768	10170.8	5989232	283183	6.00044e+06	283760	567521	0.998409
WT-PD074	39.2569	175.543	1892.54	17	310	0.991209	2.14912	3.42881	3.99	487.897	49.2765	154076	15407.6	315.796	44.8836	5.9e-06	2.6e-06	0.998137	0.000862717	6360000	264000	0.049317	0.013	641.121	64.1121	7330000000	345000000	624.221	39.1736	43247	19166.4	6316753	264695	6.32854e+06	265245	530491	0.995054
WT-PD075	39.256	175.54	1784.99			0.990393	2.33577	3.59817	3.7	452.436	45.695	154076	15407.6	340.547	48.4015	5.9e-06	2.6e-06	0.997991	0.000930336	6060000	264000	0.049317	0.013	641.121	64.1121	12400000000	456000000	351.59	20.0443	73160	32352.1	5986840	265975	5.99889e+06	266569	533138	0.989916
PR-PD083	39.237	175.567	1730.69	16	310	0.979067	2.27907	3.538	3.71	453.659	45.8185	211342	21134.2	465.862	66.2123	5.9e-06	2.6e-06	0.997251	0.00127268	9390000	441000	0.155732	0.02	3114.63	311.463	65600000000	2020000000	102.979	5.78322	387040	170976	9002960	472984	9.02777e+06	474427	948855	0.961424
PR-PD084	39.2386	175.569	1860.87	24	180	0.987674	2.18333	4.66036	4.03	492.788	49.7705	211342	21134.2	428.87	60.9547	5.9e-06	2.6e-06	0.99747	0.00117162	9420000	444000	0.155732	0.02	3114.63	311.463	77200000000	2380000000	87.7847	4.94409	455480	201211	8964520	487465	8.98726e+06	488815	977630	0.954062
PR-PD085	39.2385	175.569	1857.91	16	330	0.997029	2.11644	4.25192	4.07	497.68	50.2645	211342	21134.2	424.655	60.3557	5.9e-06	2.6e-06	0.997495	0.00116011	10690000	494000	0.155732	0.02	3114.63	311.463	58400000000	1820000000	131.689	7.34008	344560	152219	10345440	516920	1.03714e+07	518359	1.03672e+06	0.970199
TFa-PD088	39.2067	175.567	1308.16			0.999117	2.39286	3.75195	2.63	321.596	32.4805	116652	11665.2	362.728	51.554	5.9e-06	2.6e-06	0.99786	0.00099093	4650000	289000	0.0512741	0.015	769.111	76.9111	16400000000	610000000	203.983	14.7746	96760	42791.6	4553240	292151	4.56301e+06	292812	585625	0.981291
TFa-PD090	39.206	175.567	1290.42	16	90	0.996052	2.31034	4.999	2.59	316.705	31.9865	116652	11665.2	368.33	52.3502	5.9e-06	2.6e-06	0.997827	0.00100623	4380000	270000	0.0512741	0.015	769.111	76.9111	10100000000	478000000	311.988	24.2465	59590	26411	4320410	271289	4.32982e+06	271915	543829	0.988543
TFa-PD091	39.2059	175.566	1288.15			0.998828	2.22951	4.2009	2.6	317.928	32.11	116652	11665.2	366.913	52.1489	5.9e-06	2.6e-06	0.997835	0.00100236	4690000	287000	0.0512741	0.015	769.111	76.9111	11400000000	426000000	295.974	21.2218	67260	29746.4	4622740	288537	4.63277e+06	289201	578402	0.987797
TSa-PD205	39.2761	175.602	1905.05			0.982594	2.12167	5.5788	3.9	476.892	48.165	105273	10527.3	220.748	31.3747	5.9e-06	2.6e-06	0.998698	0.000603059	3980000	224000	0.0304717	0.01	304.717	30.4717	5070000000	993000000	564.755	115.088	29913	14425.3	3950087	224464	3.95524e+06	224769	449539	0.993778
TSa-PD206	39.2761	175.602	1905.87			0.997086	2.20879	4.8358	3.93	480.56	48.5355	105273	10527.3	219.063	31.1352	5.9e-06	2.6e-06	0.998708	0.000598455	4410000	235000	0.0304717	0.01	304.717	30.4717	1370000000	788000000	2315.81	1337.72	8083	5856.87	4401917	235073	4.40761e+06	235392	470784	0.999459
TSa-PD207	39.2761	175.602	1905.49			0.997086	2.37	4.15525	3.94	481.783	48.659	105273	10527.3	218.507	31.0561	5.9e-06	2.6e-06	0.998711	0.000596936	4610000	233000	0.0304717	0.01	304.717	30.4717	5530000000	563000000	599.737	68.1684	32627	14756.7	4577373	233467	4.58328e+06	233784	467569	0.994204
TSb-PD209	39.2815	175.599	1932.53			0.996907	2.19788	2.42476	4.04	494.011	49.894	75449	7544.9	152.727	21.7069	5.9e-06	2.6e-06	0.999099	0.000417233	5060000	311000	0.0505937	0.01	505.937	50.5937	36600000	1380000000	Below detection limit	-	215.94	8142.56	5.05978e+06	311107	5.06435e+06	311394	622789	1.00086
TSb-PD210	39.2815	175.599	1935.04	17	90	0.98868	2.13861	2.90487	4.09	500.125	50.5115	75449	7544.9	150.86	21.4416	5.9e-06	2.6e-06	0.99911	0.000412132	5860000	279000	0.0505937	0.01	505.937	50.5937	14100000000	973000000	298.995	25.0671	83190	37106.8	5776810	281457	5.78196e+06	281718	563435	0.986682
TSb-PD211	39.2816	175.599	1929.21	20	110	0.992742	2.25714	3.67811	4.07	497.68	50.2645	75449	7544.9	151.602	21.5469	5.9e-06	2.6e-06	0.999106	0.000414158	5780000	280000	0.0505937	0.01	505.937	50.5937	7960000000	544000000	522.396	43.7608	46964	20943.4	5733036	280782	5.73817e+06	281044	562087	0.992763
TFt-PD212	39.2726	175.626	1521.19			0.993525	2.06716	5.85288	2.94	359.503	36.309	76183.7	7618.37	211.914	30.119	5.9e-06	2.6e-06	0.99875	0.000578924	2710000	203000	0.070274	0.01	702.74	70.274	9480000000	558000000	205.658	19.5924	55932	24866.9	2654068	204517	2.65739e+06	204779	409558	0.980587
TFt-PD213	39.2726	175.626	1521.96	10	40	0.997754	2.13714	6.47738	3.02	369.286	37.297	76183.7	7618.37	206.3	29.3212	5.9e-06	2.6e-06	0.998783	0.000563588	3860000	274000	0.070274	0.01	702.74	70.274	10300000000	419000000	269.61	22.058	60770	26893.9	3799230	275317	3.80386e+06	275661	551321	0.985456
TFt-PD214	39.2723	175.627	1506.44			0.987974	2.22692	6.4524	2.89	353.389	35.6915	76183.7	7618.37	215.58	30.6401	5.9e-06	2.6e-06	0.998728	0.00058894	2470000	137000	0.070274	0.01	702.74	70.274	6760000000	580000000	262.867	26.856	39884	17906	2430116	138165	2.43321e+06	138349	276697	0.985106
MN-PD217	39.2829	175.532	1815.94			0.99294	2.10909	2.6236	3.65	446.322	45.0775	65244.4	6524.44	146.182	20.7767	5.9e-06	2.6e-06	0.999138	0.000399353	3490000	242000	0.0623063	0.008	498.45	49.845	3020000000	486000000	831.388	145.684	17818	8359.18	3472182	242144	3.47518e+06	242357	484715	0.995753
MN-PD218	39.2829	175.532	1813.91	13	220	0.99294	2.24038	5.19289	3.67	448.768	45.3245	65244.4	6524.44	145.386	20.6635	5.9e-06	2.6e-06	0.999142	0.000397177	3820000	233000	0.0623063	0.008	498.45	49.845	3720000000	435000000	738.764	97.4336	21948	10006.7	3798052	233215	3.80131e+06	233420	466840	0.995108
MN-PD219	39.2829	175.532	1812.11			0.99294	2.22363	3.98514	3.48	425.534	42.978	65244.4	6524.44	153.324	21.7917	5.9e-06	2.6e-06	0.999095	0.000418862	2470000	191000	0.0623063	0.008	498.45	49.845	2310000000	562000000	769.255	196.378	13629	6860.51	2456371	191123	2.4586e+06	191299	382598	0.995383
MN-PD220	39.2829	175.532	1817.5			0.99294	2.06289	3.21594	3.68	449.99	45.448	65244.4	6524.44	144.991	20.6073	5.9e-06	2.6e-06	0.999145	0.000396098	3910000	254000	0.0623063	0.008	498.45	49.845	4210000000	490000000	668.159	89.0597	24839	11321.3	3885161	254252	3.88849e+06	254475	508949	0.994498
MN-PD221	39.2829	175.533	1822.79			0.99294	2.2	4.02536	3.65	446.322	45.0775	65244.4	6524.44	146.182	20.7767	5.9e-06	2.6e-06	0.999138	0.000399353	3300000	204000	0.0623063	0.008	498.45	49.845	1450000000	345000000	1637.31	402.501	8555	4284.41	3291445	204045	3.29429e+06	204225	408451	0.998269
MS-PD222	39.2845	175.53	1750.57	36	170	0.954534	2.23316	4.96854	3.39	414.529	41.8665	75883.2	7588.32	183.059	26.0179	5.9e-06	2.6e-06	0.99892	0.000500095	2580000	159000	0.0901247	0.01	901.247	90.1247	5000000000	365000000	371.223	35.4649	29500	13177.2	2550500	159545	2.55326e+06	159723	319445	0.989635
MS-PD223	39.2845	175.531	1751.37			0.992308	2.41176	4.00989	3.37	412.084	41.6195	75883.2	7588.32	184.145	26.1723	5.9e-06	2.6e-06	0.998914	0.000503063	2510000	166000	0.0901247	0.01	901.247	90.1247	1160000000	524000000	1556.69	710.689	6844	4319.06	2503156	166056	2.50588e+06	166242	332483	0.998358
MS-PD224	39.2845	175.53	1750.94			0.992308	2.32836	4.10403	3.28	401.078	40.508	75883.2	7588.32	189.198	26.8904	5.9e-06	2.6e-06	0.998884	0.000516866	2080000	163000	0.0901247	0.01	901.247	90.1247	4046000000	1050000000	369.847	100.262	23871.4	12208.2	2.05613e+06	163457	2.05843e+06	163643	327285	0.989628
Cta-PD229	39.2958	175.539	1924.04	7	300	0.995813	1.96316	3.15022	4.08	498.902	50.388	181312	18131.2	363.421	51.6525	5.9e-06	2.6e-06	0.997856	0.000992824	6570000	333000	0.0415498	0.015	623.248	62.3248	23500000000	874000000	201.133	12.6445	138650	61317.2	6431350	338598	6.44517e+06	339386	678773	0.981
Cta-PD230	39.2959	175.54	1925.05			0.995875	2.20645	2.88229	4.09	500.125	50.5115	181312	18131.2	362.533	51.5263	5.9e-06	2.6e-06	0.997861	0.000990396	6930000	358000	0.0415498	0.015	623.248	62.3248	27600000000	1070000000	180.638	11.6671	162840	72037.2	6767160	365176	6.78167e+06	366020	732041	0.978595
CTb-PD231	39.2998	175.539	1877.53			0.995679	2.21538	3.41317	3.54	432.871	43.719	125593	12559.3	290.14	41.2371	5.9e-06	2.6e-06	0.998288	0.000792627	2110000	140000	0.0438853	0.008	351.082	35.1082	6600000000	584000000	229.998	25.4374	38940	17502.5	2071060	141090	2.07461e+06	141341	282683	0.983228
CTb-PD232	39.3001	175.539	1873.18	20	190	0.991025	2.13889	4.1405	3.82	467.11	47.177	125593	12559.3	268.873	38.2145	5.9e-06	2.6e-06	0.998414	0.000734529	4000000	237000	0.0438853	0.008	351.082	35.1082	7380000000	453000000	389.932	33.2663	43542	19373.2	3956458	237791	3.96274e+06	238186	476372	0.990686
CTb-PD233	39.3001	175.539	1872.03	15	240	0.994128	2.16869	2.83466	3.81	465.887	47.0535	125593	12559.3	269.578	38.3148	5.9e-06	2.6e-06	0.998409	0.000736457	3860000	252000	0.0438853	0.008	351.082	35.1082	9310000000	618000000	298.279	27.7712	54929	24479.1	3805071	253186	3.81113e+06	253605	507210	0.98734
CTb-PD234-a	39.3003	175.539	1873.39			0.995679	2.15179	3.16138	3.81	465.887	47.0535	125593	12559.3	269.578	38.3148	5.9e-06	2.6e-06	0.998409	0.000736457	3800000	241000	0.0438853	0.008	351.082	35.1082	9670000000	738000000	282.711	28.0536	57053	25516.3	3742947	242347	3.74891e+06	242749	485498	0.986555
CTb-PD234-b	39.3003	175.539	1873.39			0.995679	2.15179	3.16138	3.82	467.11	47.177	125593	12559.3	268.873	38.2145	5.9e-06	2.6e-06	0.997983	0.000734529	3960000	256000	0.0438853	0.008	351.082	35.1082	6040000000	501000000	471.676	49.6031	35636	15979.8	3924364	256498	3.93229e+06	257033	514066	0.993003
CTb-PD234-M	39.3003	175.539	1873.39			0.995679	2.15179	3.16138	3.82	467.11	47.177	125593	12559.3	268.873	38.2145	5.9e-06	2.6e-06	0.997983	0.000734529															3.84875e+06	250526	501051
LC-PD254	39.2718	175.605	1827.1			0.996536	2.01471	5.41518	3.78	462.218	46.683	117670	11767	254.578	36.1828	5.9e-06	2.6e-06	0.998498	0.000695476	5130000	364000	0.0506016	0.01	506.016	50.6016	12200000000	519000000	302.512	25.027	71980	31867.5	5058020	365392	5.06563e+06	365959	731918	0.987452
LC-PD255	39.2718	175.605	1826.64			0.996536	2.06548	6.4345	3.77	460.996	46.5595	117670	11767	255.253	36.2787	5.9e-06	2.6e-06	0.998494	0.000697321	5010000	355000	0.0506016	0.01	506.016	50.6016	17500000000	554000000	205.961	15.9843	103250	45617.3	4906750	357919	4.91415e+06	358475	716950	0.980868
LC-PD256	39.2718	175.605	1825.62			0.996178	2.07965	6.03525	3.7	452.436	45.695	117670	11767	260.082	36.9651	5.9e-06	2.6e-06	0.998466	0.000710514	3990000	288000	0.0506016	0.01	506.016	50.6016	14600000000	526000000	196.61	15.8609	86140	38086.6	3903860	290507	3.90986e+06	290967	581934	0.979915
LC-PD257	39.2718	175.605	1824.68	16	330	0.996178	2.05328	3.6837	3.78	462.218	46.683	117670	11767	254.578	36.1828	5.9e-06	2.6e-06	0.998498	0.000695476	5280000	330000	0.0506016	0.01	506.016	50.6016	8930000000	539000000	425.371	36.9593	52687	23434.8	5227313	330831	5.23518e+06	331349	662698	0.991511
WG-PD325	39.2557	175.555	2079.09	21	357	0.991094	2.24793	4.032	4.39	536.809	54.2165	245454	24545.4	457.246	64.9877	5.9e-06	2.6e-06	0.997302	0.00124914	4440000	216000	0.0329442	0.008	263.554	26.3554	9090000000	498000000	351.402	25.7464	53631	23815.9	4386369	217309	4.39823e+06	217966	435933	0.990593
WG-PD326	39.2556	175.555	2066.7			0.994994	2.29775	3.14685	4.26	520.913	52.611	245454	24545.4	471.199	66.9709	5.9e-06	2.6e-06	0.99722	0.00128726	3670000	191000	0.0329442	0.008	263.554	26.3554	11500000000	680000000	229.59	18.0852	67850	30168	3602150	193368	3.61219e+06	193963	387926	0.984249
DC-PD327	39.2346	175.551	1600.45			0.998551	2.22481	3.51733	3.1	379.068	38.285	66521.4	6652.14	175.487	24.9417	5.9e-06	2.6e-06	0.998965	0.000479409	2820000	207000	0.0401165	0.008	320.932	32.0932	7180000000	489000000	282.559	28.2935	42362	18889.6	2777638	207860	2.78052e+06	208080	416160	0.985999
DC-PD329	39.2342	175.551	1591.8			0.998551	2.36527	4.33924	3.11	380.291	38.4085	66521.4	6652.14	174.922	24.8615	5.9e-06	2.6e-06	0.998968	0.000477867	3080000	225000	0.0401165	0.008	320.932	32.0932	9750000000	488000000	227.264	20.125	57525	25513	3022475	226442	3.0256e+06	226680	453361	0.982337
DC-PD330	39.2341	175.551	1590.27			0.998551	2.21472	3.38597	3.09	377.845	38.1615	66521.4	6652.14	176.055	25.0224	5.9e-06	2.6e-06	0.998961	0.00048096	2890000	215000	0.0401165	0.008	320.932	32.0932	7990000000	526000000	260.217	25.85	47141	21004.5	2842859	216024	2.84582e+06	216253	432505	0.984711

## Sheet: Readme
Value	Calculation	Column		Error column	Error calculation
P3	Mean production rate * scaling factor	K		L	Mean production rate error * scaling factor
P4	From spreadsheet	M		N	Considered 10% error
P4/P3	P4/P3	O		P	P4/P3 * sqrt( (σP4/P4)^2 + (σP3/P3)^2 )
3/4HeMAG	From bibliography	Q		R	Considered 20% error
R factor	1 - (P4/P3)*(3/4HeMAG)	S		T	R factor * sqrt ( (σ(P4/P3)/(P4/P3))^2 + (σ(3/4HeMAG)/(3/4HeMAG))^2 )
3Hetot	Measured	U		V	Measured
3Henuc	From spreadsheet	Y		Z	Considered 10% error
4Hetot	Measured	AA		AB	Measured
Total 3He/4He	Measured	AC		AD	3Hetot/4Hetot * sqrt ( (σ3Hetot/3Hetot)^2 + (σ4Hetot/4Hetot)^2 )
4He*(3/4HeMag)	4Hetot * 3/4HeMAG	AE		AF	4Hetot * 3/4HeMAG * sqrt ( (σ4Hetot/4Hetot)^2+((σ 3/4HeMAG)/(3/4HeMAG))^2 )
H	3Hetot - 4HexM	AG		AH	sqrt (σHetot^2 + σ4HexM^2)
Hecos	H/R	AI		AJ	H/R * sqrt ( (σH/H)^2 + (σR/R)^2 )
