# Supplementary material for: Cosmogenic 3 He chronology of postglacial lava flows at Mt. Ruapehu, New Zealand
Source: Copernicus journal article supplement (doi:10.5194/egusphere-2024-163), 2024-01-23
Supplement: Supplementary file 4 [file S1-samples-data-He-measurements-and-non-cosmogenic-3He-corrections.xlsx]

## Sheet: Data&Calculations
Sample	Lat	Long	Elevation	Surface dip	Dip direction	Shielding factor	Density (g/cm3)	Thickness (cm)	Scaling factor (Lal-Stone corrected)	P3 (at/g/y)	P3 1σ	P4 (at/g/y)	P4 1σ	P4/P3	1sigma P4/P3	3/4HeMAG	HeMAG 1σ	R factor	Rf 1σ	3Hetot	3Hetot 1σ	Pnuc	He closure age for 3Henuc (Ma)	3Henuc	1sigma3Henuc	4Hetot	4Hetot 1σ	4He*(3/4HeMag)	1sig 4He*(3/4HeMag)	H	1sigmaH	3Hecos	3Hecos 1σ	3Hecos 2σ	3Hecos/3Hetot
SC-PD001	39.2143	175.601	1438.96			0.998149	1.89091	3.60981	2.83	346.052	34.9505	312822	31282.2	903.972	128.48	7.5e-06	1.5e-06	0.99322	0.00166348	3850000	278000	0.0405777	0.01	405.777	40.5777	51400000000	1150000000	385500	77580.9	3.46409e+06	288622	3.48815e+06	290651	581302	0.906013
SC-PD002	39.2143	175.601	1439.33			0.998149	2.01042	3.17036	2.82	344.83	34.827	312822	31282.2	907.178	128.936	7.5e-06	1.5e-06	0.993196	0.00166937	3590000	261000	0.0405777	0.01	405.777	40.5777	30300000000	765000000	227250	45810.7	3.36234e+06	264990	3.38579e+06	266866	533732	0.943116
SC-PD003	39.2146	175.6	1443.3			0.998149	2.01064	2.35345	2.82	344.83	34.827	312822	31282.2	907.178	128.936	7.5e-06	1.5e-06	0.993196	0.00166937	3450000	246000	0.0405777	0.01	405.777	40.5777	39100000000	854000000	293250	58998.7	3.15634e+06	252976	3.17838e+06	254765	509530	0.921268
SC-PD093	39.2115	175.614	1308.18	17	40	0.992567	2.3	2.59294	2.56	313.037	31.616	371386	37138.6	1186.4	168.621	7.5e-06	1.5e-06	0.991102	0.00218319	2970000	218000	0.0537076	0.01	537.076	53.7076	9160000000	499000000	68700	14240.6	2.90076e+06	218465	2.92735e+06	220520	441040	0.985639
WP-PD007	39.2479	175.588	1911.73	10	190	0.996085	2.13253	3.2475	4.02	491.566	49.647	608461	60846.1	1237.8	175.927	7.5e-06	1.5e-06	0.990716	0.00227778	5630000	227000	0.0414497	0.01	414.497	41.4497	20600000000	742000000	154500	31397.1	5.47509e+06	229161	5.52681e+06	231657	463314	0.981671
WP-PD008	39.2479	175.588	1912.06	18	30	0.995222	2.06228	3.02294	3.99	487.897	49.2765	608461	60846.1	1247.11	177.25	7.5e-06	1.5e-06	0.990647	0.00229491	5220000	222000	0.0414497	0.01	414.497	41.4497	19400000000	342000000	145500	29212.8	5.07409e+06	223914	5.12241e+06	226339	452678	0.981305
BR-PD014	39.2201	175.541	1360.02			0.999203	2.15385	2.7298	2.6	317.928	32.11	75434.5	7543.45	237.269	33.7227	7.5e-06	1.5e-06	0.99822	0.000436619	2330000	124000	0.0564766	0.01	564.766	56.4766	6060000000	482000000	45450	9782.45	2.28399e+06	124385	2.28862e+06	124611	249222	0.982241
BR-PD016	39.2198	175.538	1359.23	28	55	0.981487	2.32184	2.63267	2.62	320.374	32.357	75434.5	7543.45	235.458	33.4653	7.5e-06	1.5e-06	0.998234	0.000433286	2570000	135000	0.0564766	0.01	564.766	56.4766	14500000000	617000000	108750	22236.8	2.46069e+06	136819	2.4656e+06	137065	274131	0.959379
BR-PD017	39.219	175.541	1332.59			0.998016	2.25134	2.70558	2.56	313.037	31.616	75434.5	7543.45	240.977	34.2497	7.5e-06	1.5e-06	0.998193	0.000443442	2470000	139000	0.0564766	0.01	564.766	56.4766	16500000000	770000000	123750	25414.8	2.34569e+06	141304	2.3505e+06	141564	283128	0.951619
BR-PD018	39.219	175.541	1332.43			0.998103	2.14737	4.32904	2.6	317.928	32.11	75434.5	7543.45	237.269	33.7227	7.5e-06	1.5e-06	0.99822	0.000436619	2870000	161000	0.0564766	0.01	564.766	56.4766	11400000000	788000000	85500	18092.5	2.78394e+06	162013	2.78946e+06	162307	324614	0.971939
GR-PD023	39.3074	175.562	2147.25	45	180	0.920611	2.2381	4.46078	4.78	584.498	59.033	44271.4	11067.9	75.7426	20.4225	7.5e-06	1.5e-06	0.999432	0.000190706	7610000	493000	0.0253775	0.02	507.549	50.7549	11900000000	1320000000	89250	20411.6	7.52024e+06	493422	7.52502e+06	493705	987410	0.988834
GR-PD024	39.3074	175.562	2145.37			0.990045	2.17582	4.60611	4.7	574.716	58.045	44271.4	11067.9	77.0318	20.7701	7.5e-06	1.5e-06	0.999422	0.000193952	6190000	388000	0.0253775	0.02	507.549	50.7549	12800000000	742000000	96000	19990.2	6.09349e+06	388515	6.09752e+06	388741	777482	0.98506
GR-PD025	39.3078	175.561	2128.1			0.99253	2.8	4.7235	4.41	539.255	54.4635	44271.4	11067.9	82.0974	22.136	7.5e-06	1.5e-06	0.999384	0.000206706	3610000	245000	0.0253775	0.02	507.549	50.7549	18700000000	975000000	140250	28987.5	3.46924e+06	246709	3.47189e+06	246862	493724	0.961742
RT-PD027	39.314	175.551	1831.43			0.996664	1.83811	5.47611	3.83	468.332	47.3005	74371.9	7437.19	158.801	22.5702	7.5e-06	1.5e-06	0.998809	0.000292224	6380000	252000	0.0295791	0.015	443.687	44.3687	17400000000	773000000	130500	26736.1	6.24906e+06	253414	6.25695e+06	253723	507446	0.980713
RT-PD028	39.314	175.551	1833.06			0.996378	1.78986	5.33429	3.82	467.11	47.177	74371.9	7437.19	159.217	22.6293	7.5e-06	1.5e-06	0.998806	0.000292989	5730000	258000	0.0295791	0.015	443.687	44.3687	21300000000	1160000000	159750	33113.3	5.56981e+06	260116	5.57691e+06	260432	520865	0.973283
RT-PD029	39.314	175.551	1832.92			0.996378	1.83811	5.32946	3.84	469.555	47.424	74371.9	7437.19	158.388	22.5115	7.5e-06	1.5e-06	0.998812	0.000291463	6420000	363000	0.0295791	0.015	443.687	44.3687	22400000000	1760000000	168000	36099.9	6.25156e+06	364791	6.25944e+06	365229	730458	0.97499
RT-PD030	39.3143	175.551	1816.39	20	230	0.988054	1.88636	5.04964	3.81	465.887	47.0535	74371.9	7437.19	159.635	22.6887	7.5e-06	1.5e-06	0.998803	0.000293758	6450000	306000	0.0295791	0.015	443.687	44.3687	9790000000	560000000	73425	15273.8	6.37613e+06	306381	6.38422e+06	306754	613508	0.989801
RT-PD045	39.3234	175.552	1585.95	20	80	0.991255	2.8	4.23172	3.27	399.856	40.3845	74454.8	7445.48	186.204	26.465	7.5e-06	1.5e-06	0.998603	0.00034265	6300000	378000	0.0400594	0.015	600.891	60.0891	18300000000	665000000	137250	27899.4	6.16215e+06	379028	6.17137e+06	379564	759128	0.979582
RT-PD046-a	39.3249	175.551	1567.56	29	145	0.978587	2.07087	3.61406	3.23	394.964	39.8905	74454.8	7445.48	188.51	26.7927	7.5e-06	1.5e-06	0.998586	0.000346894	6140000	245000	0.0400594	0.015	600.891	60.0891	7350000000	514000000	55125	11679.5	6.08427e+06	245278	6.09349e+06	245635	491269	0.992425
RT-PD046-b	39.3249	175.551	1567.56	29	145	0.978587	2.07087	3.61406	3.22	393.742	39.767	74454.8	7445.48	189.096	26.8759	7.5e-06	1.5e-06	0.998582	0.000347971	5980000	303000	0.0400594	0.015	600.891	60.0891	9830000000	818000000	73725	15970.4	5.90567e+06	303421	5.91466e+06	303859	607717	0.989074
RT-PD046-M	39.3249	175.551	1567.56	29	145	0.978587	2.07087	3.61406	3.22	393.742	39.767	74454.8	7445.48	189.096	26.8759	7.5e-06	1.5e-06	0.998582	0.000347971													6.03018e+06	266247	532494	#DIV/0!
RT-PD047	39.3251	175.55	1567.39			0.997456	2.2716	3.03016	3.21	392.519	39.6435	74454.8	7445.48	189.685	26.9596	7.5e-06	1.5e-06	0.998577	0.000349055	5910000	288000	0.0400594	0.015	600.891	60.0891	11300000000	620000000	84750	17576.3	5.82465e+06	288536	5.83355e+06	288954	577908	0.987064
RT-PD048	39.325	175.55	1567.29			0.997456	2.18868	3.37521	3.06	374.177	37.791	74454.8	7445.48	198.983	28.2812	7.5e-06	1.5e-06	0.998508	0.000366166	3080000	156000	0.0400594	0.015	600.891	60.0891	16400000000	682000000	123000	25126.1	2.9564e+06	158011	2.96142e+06	158250	316501	0.9615
NR-PD053	39.3381	175.587	1369.76	15	3	0.995825	2.38938	4.83258	2.94	359.503	36.309	101036	10103.6	281.043	39.9443	7.5e-06	1.5e-06	0.997892	0.000517171	16200000	670000	0.0654239	0.045	2944.07	294.407	24600000000	844000000	184500	37439	1.60126e+07	671045	1.60493e+07	672514	1.34503e+06	0.990699
NR-PD054	39.3384	175.588	1372.88			0.999856	2.06098	4.20833	2.95	360.726	36.4325	101036	10103.6	280.09	39.8088	7.5e-06	1.5e-06	0.997899	0.000515418	15300000	633000	0.0654239	0.045	2944.07	294.407	18900000000	653000000	141750	28769.9	1.51553e+07	633654	1.51902e+07	635036	1.27007e+06	0.992821
NR-PD055	39.3384	175.588	1372.47			0.999432	2.15094	3.21689	2.93	358.28	36.1855	101036	10103.6	282.002	40.0806	7.5e-06	1.5e-06	0.997885	0.000518936	14600000	618000	0.0654239	0.045	2944.07	294.407	17900000000	773000000	134250	27468.8	1.44628e+07	618610	1.44964e+07	619967	1.23993e+06	0.992905
NR-PD057	39.3384	175.588	1372.58			0.995308	2.46721	3.49706	2.94	359.503	36.309	101036	10103.6	281.043	39.9443	7.5e-06	1.5e-06	0.997892	0.000517171	14800000	624000	0.0654239	0.045	2944.07	294.407	26100000000	951000000	195750	39794.4	1.46013e+07	625268	1.46351e+07	626634	1.25327e+06	0.988858
MA-PD058	39.3125	175.612	1570.71	14	190	0.996354	2.45342	2.88062	3.39	414.529	41.8665	129146	12914.6	311.549	44.2801	7.5e-06	1.5e-06	0.997663	0.000573308	20000000	831000	0.0817794	0.05	4088.97	408.897	48200000000	1460000000	361500	73124.5	1.96344e+07	834211	1.96845e+07	836241	1.67248e+06	0.984225
MA-PD059	39.3125	175.612	1569.32			0.997705	2.20833	3.19481	3.34	408.415	41.249	129146	12914.6	316.213	44.9429	7.5e-06	1.5e-06	0.997628	0.000581891	24100000	1180000	0.0817794	0.05	4088.97	408.897	95600000000	2710000000	717000	144833	2.33789e+07	1.18886e+06	2.34386e+07	1.19176e+06	2.38352e+06	0.972555
MF-PD061	39.3169	175.514	1437.04			0.970758	2.15238	3.02573	2.89	353.389	35.6915	114222	11422.2	323.22	45.9388	7.5e-06	1.5e-06	0.997576	0.000594784	4920000	263000	0.072901	0.013	947.713	94.7713	19300000000	731000000	144750	29464.6	4.7743e+06	264645	4.78685e+06	265304	530608	0.972938
MF-PD063	39.3168	175.515	1434.84			0.991208	1.8125	3.77465	2.85	348.498	35.1975	114222	11422.2	327.756	46.5835	7.5e-06	1.5e-06	0.997542	0.000603132	4000000	223000	0.072901	0.013	947.713	94.7713	21900000000	931000000	164250	33583.9	3.8348e+06	225515	3.8452e+06	226082	452165	0.961301
MF-PD064	39.3167	175.515	1433.79	11	180	0.987327	1.94595	3.57218	2.86	349.721	35.321	114222	11422.2	326.61	46.4207	7.5e-06	1.5e-06	0.99755	0.000601023	4080000	216000	0.072901	0.013	947.713	94.7713	16500000000	650000000	123750	25225.5	3.9553e+06	217468	3.96596e+06	218015	436030	0.97205
MF-PD065	39.3167	175.515	1433.29			0.987978	1.80172	2.595	2.87	350.944	35.4445	114222	11422.2	325.472	46.2589	7.5e-06	1.5e-06	0.997559	0.000598929	4470000	244000	0.072901	0.013	947.713	94.7713	17900000000	792000000	134250	27499.2	4.3348e+06	245545	4.34636e+06	246159	492319	0.97234
TC-PD066	39.3014	175.519	1533.19			0.997377	2.16509	6.22944	3.07	375.4	37.9145	75863.9	7586.39	202.088	28.7225	7.5e-06	1.5e-06	0.998484	0.00037188	4130000	205000	0.0292497	0.013	380.246	38.0246	10300000000	637000000	77250	16171.8	4.05237e+06	205637	4.0589e+06	205955	411909	0.982785
TC-PD067	39.3015	175.519	1533.56			0.997377	2.11207	4.46456	3.1	379.068	38.285	75863.9	7586.39	200.133	28.4446	7.5e-06	1.5e-06	0.998499	0.000368281	5240000	257000	0.0292497	0.013	380.246	38.0246	11400000000	470000000	85500	17459.5	5.15412e+06	257592	5.16225e+06	257987	515973	0.985162
TC-PD068	39.3015	175.519	1533.09			0.997377	2.14516	7.41329	3.09	377.845	38.1615	75863.9	7586.39	200.78	28.5366	7.5e-06	1.5e-06	0.998494	0.000369473	4740000	228000	0.0292497	0.013	380.246	38.0246	10900000000	372000000	81750	16586.3	4.65787e+06	228603	4.66528e+06	228954	457908	0.984235
TC-PD070	39.3012	175.519	1528			0.997377	1.9871	4.32687	3.08	376.622	38.038	75863.9	7586.39	201.432	28.6293	7.5e-06	1.5e-06	0.998489	0.000370672	4890000	232000	0.0292497	0.013	380.246	38.0246	8170000000	350000000	61275	12533	4.82834e+06	232338	4.83603e+06	232697	465393	0.988963
WT-PD073	39.2569	175.543	1892.38	20	260	0.986899	2.08556	3.53265	3.98	486.674	49.153	154076	15407.6	316.589	44.9964	7.5e-06	1.5e-06	0.997626	0.000582583	6010000	283000	0.049317	0.013	641.121	64.1121	3520000000	752000000	26400	7725.8	5.98296e+06	283105	5.99784e+06	283801	567602	0.997977
WT-PD074	39.2569	175.543	1892.54	17	310	0.991209	2.14912	3.42881	3.99	487.897	49.2765	154076	15407.6	315.796	44.8836	7.5e-06	1.5e-06	0.997632	0.000581123	6360000	264000	0.049317	0.013	641.121	64.1121	7330000000	345000000	54975	11295.4	6.30438e+06	264242	6.31999e+06	264894	529789	0.99371
WT-PD075	39.256	175.54	1784.99			0.990393	2.33577	3.59817	3.7	452.436	45.695	154076	15407.6	340.547	48.4015	7.5e-06	1.5e-06	0.997446	0.00062667	6060000	264000	0.049317	0.013	641.121	64.1121	12400000000	456000000	93000	18911.8	5.96636e+06	264677	5.98228e+06	265381	530762	0.987175
PR-PD083	39.237	175.567	1730.69	16	310	0.979067	2.27907	3.538	3.71	453.659	45.8185	211342	21134.2	465.862	66.2123	7.5e-06	1.5e-06	0.996506	0.000857272	9390000	441000	0.155732	0.02	3114.63	311.463	65600000000	2020000000	492000	99559.4	8.89489e+06	452099	8.9292e+06	453749	907498	0.950926
PR-PD084	39.2386	175.569	1860.87	24	180	0.987674	2.18333	4.66036	4.03	492.788	49.7705	211342	21134.2	428.87	60.9547	7.5e-06	1.5e-06	0.996783	0.000789201	9420000	444000	0.155732	0.02	3114.63	311.463	77200000000	2380000000	579000	117168	8.83789e+06	459200	8.86953e+06	460735	921470	0.941564
PR-PD085	39.2385	175.569	1857.91	16	330	0.997029	2.11644	4.25192	4.07	497.68	50.2645	211342	21134.2	424.655	60.3557	7.5e-06	1.5e-06	0.996815	0.000781444	10690000	494000	0.155732	0.02	3114.63	311.463	58400000000	1820000000	438000	88657.1	1.02489e+07	501893	1.02848e+07	503561	1.00712e+06	0.962091
TFa-PD088	39.2067	175.567	1308.16			0.999117	2.39286	3.75195	2.63	321.596	32.4805	116652	11665.2	362.728	51.554	7.5e-06	1.5e-06	0.99728	0.000667486	4650000	289000	0.0512741	0.015	769.111	76.9111	16400000000	610000000	123000	25021.8	4.52623e+06	290081	4.53935e+06	290888	581777	0.976204
TFa-PD090	39.206	175.567	1290.42	16	90	0.996052	2.31034	4.999	2.59	316.705	31.9865	116652	11665.2	368.33	52.3502	7.5e-06	1.5e-06	0.997238	0.000677795	4380000	270000	0.0512741	0.015	769.111	76.9111	10100000000	478000000	75750	15568.4	4.30348e+06	270448	4.31617e+06	271214	542427	0.985428
TFa-PD091	39.2059	175.566	1288.15			0.998828	2.22951	4.2009	2.6	317.928	32.11	116652	11665.2	366.913	52.1489	7.5e-06	1.5e-06	0.997248	0.000675188	4690000	287000	0.0512741	0.015	769.111	76.9111	11400000000	426000000	85500	17395.9	4.60373e+06	287527	4.61721e+06	288337	576674	0.984479
TSa-PD205	39.2761	175.602	1905.05			0.982594	2.12167	5.5788	3.9	476.892	48.165	105273	10527.3	220.748	31.3747	7.5e-06	1.5e-06	0.998344	0.000406218	3980000	224000	0.0304717	0.01	304.717	30.4717	5070000000	993000000	38025	10644.3	3.94167e+06	224253	3.94851e+06	224630	449261	0.992088
TSa-PD206	39.2761	175.602	1905.87			0.997086	2.20879	4.8358	3.93	480.56	48.5355	105273	10527.3	219.063	31.1352	7.5e-06	1.5e-06	0.998357	0.000403117	4410000	235000	0.0304717	0.01	304.717	30.4717	1370000000	788000000	10275	6257.09	4.39942e+06	235083	4.40697e+06	235477	470954	0.999312
TSa-PD207	39.2761	175.602	1905.49			0.997086	2.37	4.15525	3.94	481.783	48.659	105273	10527.3	218.507	31.0561	7.5e-06	1.5e-06	0.998361	0.000402094	4610000	233000	0.0304717	0.01	304.717	30.4717	5530000000	563000000	41475	9307.87	4.56822e+06	233186	4.57602e+06	233576	467152	0.99263
TSb-PD209	39.2815	175.599	1932.53			0.996907	2.19788	2.42476	4.04	494.011	49.894	75449	7544.9	152.727	21.7069	7.5e-06	1.5e-06	0.998855	0.000281046	5060000	311000	0.0505937	0.01	505.937	50.5937	36600000	1380000000	274.5	10350.1	5.05922e+06	311172	5.06553e+06	311532	623065	1.00109
TSb-PD210	39.2815	175.599	1935.04	17	90	0.98868	2.13861	2.90487	4.09	500.125	50.5115	75449	7544.9	150.86	21.4416	7.5e-06	1.5e-06	0.998869	0.000277611	5860000	279000	0.0505937	0.01	505.937	50.5937	14100000000	973000000	105750	22373.6	5.75374e+06	279896	5.76077e+06	280217	560435	0.983066
TSb-PD211	39.2816	175.599	1929.21	20	110	0.992742	2.25714	3.67811	4.07	497.68	50.2645	75449	7544.9	151.602	21.5469	7.5e-06	1.5e-06	0.998863	0.000278975	5780000	280000	0.0505937	0.01	505.937	50.5937	7960000000	544000000	59700	12617.8	5.71979e+06	280284	5.72681e+06	280608	561216	0.990798
TFt-PD212	39.2726	175.626	1521.19			0.993525	2.06716	5.85288	2.94	359.503	36.309	76183.7	7618.37	211.914	30.119	7.5e-06	1.5e-06	0.998411	0.000389961	2710000	203000	0.070274	0.01	702.74	70.274	9480000000	558000000	71100	14823	2.6382e+06	203540	2.6431e+06	203867	407734	0.975314
TFt-PD213	39.2726	175.626	1521.96	10	40	0.997754	2.13714	6.47738	3.02	369.286	37.297	76183.7	7618.37	206.3	29.3212	7.5e-06	1.5e-06	0.998453	0.000379631	3860000	274000	0.070274	0.01	702.74	70.274	10300000000	419000000	77250	15766.4	3.78205e+06	274453	3.78861e+06	274882	549765	0.981506
TFt-PD214	39.2723	175.627	1506.44			0.987974	2.22692	6.4524	2.89	353.389	35.6915	76183.7	7618.37	215.58	30.6401	7.5e-06	1.5e-06	0.998383	0.000396707	2470000	137000	0.070274	0.01	702.74	70.274	6760000000	580000000	50700	11033.7	2.4186e+06	137444	2.42322e+06	137670	275339	0.98106
MN-PD217	39.2829	175.532	1815.94			0.99294	2.10909	2.6236	3.65	446.322	45.0775	65244.4	6524.44	146.182	20.7767	7.5e-06	1.5e-06	0.998904	0.000269003	3490000	242000	0.0623063	0.008	498.45	49.845	3020000000	486000000	22650	5814.37	3.46685e+06	242070	3.47116e+06	242337	484675	0.9946
MN-PD218	39.2829	175.532	1813.91	13	220	0.99294	2.24038	5.19289	3.67	448.768	45.3245	65244.4	6524.44	145.386	20.6635	7.5e-06	1.5e-06	0.99891	0.000267537	3820000	233000	0.0623063	0.008	498.45	49.845	3720000000	435000000	27900	6463.77	3.7916e+06	233090	3.79624e+06	233346	466693	0.99378
MN-PD219	39.2829	175.532	1812.11			0.99294	2.22363	3.98514	3.48	425.534	42.978	65244.4	6524.44	153.324	21.7917	7.5e-06	1.5e-06	0.99885	0.000282144	2470000	191000	0.0623063	0.008	498.45	49.845	2310000000	562000000	17325	5456.41	2.45218e+06	191078	2.4555e+06	191299	382598	0.994129
MN-PD220	39.2829	175.532	1817.5			0.99294	2.06289	3.21594	3.68	449.99	45.448	65244.4	6524.44	144.991	20.6073	7.5e-06	1.5e-06	0.998913	0.00026681	3910000	254000	0.0623063	0.008	498.45	49.845	4210000000	490000000	31575	7306.49	3.87793e+06	254105	3.88265e+06	254384	508768	0.993004
MN-PD221	39.2829	175.533	1822.79			0.99294	2.2	4.02536	3.65	446.322	45.0775	65244.4	6524.44	146.182	20.7767	7.5e-06	1.5e-06	0.998904	0.000269003	3300000	204000	0.0623063	0.008	498.45	49.845	1450000000	345000000	10875	3380.2	3.28863e+06	204028	3.29274e+06	204254	408508	0.997799
MS-PD222	39.2845	175.53	1750.57	36	170	0.954534	2.23316	4.96854	3.39	414.529	41.8665	75883.2	7588.32	183.059	26.0179	7.5e-06	1.5e-06	0.998627	0.000336862	2580000	159000	0.0901247	0.01	901.247	90.1247	5000000000	365000000	37500	7983.98	2.5416e+06	159200	2.546e+06	159422	318843	0.98682
MS-PD223	39.2845	175.531	1751.37			0.992308	2.41176	4.00989	3.37	412.084	41.6195	75883.2	7588.32	184.145	26.1723	7.5e-06	1.5e-06	0.998619	0.000338861	2510000	166000	0.0901247	0.01	901.247	90.1247	1160000000	524000000	8700	4297.96	2.5004e+06	166056	2.50476e+06	166287	332575	0.997912
MS-PD224	39.2845	175.53	1750.94			0.992308	2.32836	4.10403	3.28	401.078	40.508	75883.2	7588.32	189.198	26.8904	7.5e-06	1.5e-06	0.998581	0.000348159	2080000	163000	0.0901247	0.01	901.247	90.1247	4046000000	1050000000	30345	9942.25	2.04875e+06	163303	2.05257e+06	163537	327073	0.986811
Cta-PD229	39.2958	175.539	1924.04	7	300	0.995813	1.96316	3.15022	4.08	498.902	50.388	181312	18131.2	363.421	51.6525	7.5e-06	1.5e-06	0.997274	0.000668762	6570000	333000	0.0415498	0.015	623.248	62.3248	23500000000	874000000	176250	35854.3	6.39313e+06	334925	6.41122e+06	335868	671735	0.975833
Cta-PD230	39.2959	175.54	1925.05			0.995875	2.20645	2.88229	4.09	500.125	50.5115	181312	18131.2	362.533	51.5263	7.5e-06	1.5e-06	0.997281	0.000667127	6930000	358000	0.0415498	0.015	623.248	62.3248	27600000000	1070000000	207000	42170.6	6.72238e+06	360475	6.74133e+06	361486	722972	0.972775
CTb-PD231	39.2998	175.539	1877.53			0.995679	2.21538	3.41317	3.54	432.871	43.719	125593	12559.3	290.14	41.2371	7.5e-06	1.5e-06	0.997824	0.00053391	2110000	140000	0.0438853	0.008	351.082	35.1082	6600000000	584000000	49500	10825.6	2.06015e+06	140418	2.06499e+06	140728	281457	0.97867
CTb-PD232	39.3001	175.539	1873.18	20	190	0.991025	2.13889	4.1405	3.82	467.11	47.177	125593	12559.3	268.873	38.2145	7.5e-06	1.5e-06	0.997983	0.000494776	4000000	237000	0.0438853	0.008	351.082	35.1082	7380000000	453000000	55350	11579.6	3.9443e+06	237283	3.95262e+06	237770	475541	0.988155
CTb-PD233	39.3001	175.539	1872.03	15	240	0.994128	2.16869	2.83466	3.81	465.887	47.0535	125593	12559.3	269.578	38.3148	7.5e-06	1.5e-06	0.997978	0.000496074	3860000	252000	0.0438853	0.008	351.082	35.1082	9310000000	618000000	69825	14714.1	3.78982e+06	252429	3.79785e+06	252948	505895	0.9839
CTb-PD234-a	39.3003	175.539	1873.39			0.995679	2.15179	3.16138	3.81	465.887	47.0535	125593	12559.3	269.578	38.3148	7.5e-06	1.5e-06	0.997978	0.000496074	3800000	241000	0.0438853	0.008	351.082	35.1082	9670000000	738000000	72525	15525.2	3.72712e+06	241500	3.73503e+06	241996	483992	0.982902
CTb-PD234-b	39.3003	175.539	1873.39			0.995679	2.15179	3.16138	3.82	467.11	47.177	125593	12559.3	268.873	38.2145	7.5e-06	1.5e-06	0.997983	0.000494776	3960000	256000	0.0438853	0.008	351.082	35.1082	6040000000	501000000	45300	9808.28	3.91435e+06	256188	3.92261e+06	256713	513426	0.990558
CTb-PD234-M	39.3003	175.539	1873.39			0.995679	2.15179	3.16138	3.82	467.11	47.177	125593	12559.3	268.873	38.2145	7.5e-06	1.5e-06	0.997983	0.000494776													3.83715e+06	250008	500017	#DIV/0!
LC-PD254	39.2718	175.605	1827.1			0.996536	2.01471	5.41518	3.78	462.218	46.683	117670	11767	254.578	36.1828	7.5e-06	1.5e-06	0.998091	0.00046847	5130000	364000	0.0506016	0.01	506.016	50.6016	12200000000	519000000	91500	18709.4	5.03799e+06	364481	5.04814e+06	365185	730371	0.984043
LC-PD255	39.2718	175.605	1826.64			0.996536	2.06548	6.4345	3.77	460.996	46.5595	117670	11767	255.253	36.2787	7.5e-06	1.5e-06	0.998086	0.000469713	5010000	355000	0.0506016	0.01	506.016	50.6016	17500000000	554000000	131250	26576.8	4.87824e+06	355993	4.88811e+06	356684	713367	0.97567
LC-PD256	39.2718	175.605	1825.62			0.996178	2.07965	6.03525	3.7	452.436	45.695	117670	11767	260.082	36.9651	7.5e-06	1.5e-06	0.998049	0.000478599	3990000	288000	0.0506016	0.01	506.016	50.6016	14600000000	526000000	109500	22252.5	3.87999e+06	288858	3.88808e+06	289429	578858	0.974457
LC-PD257	39.2718	175.605	1824.68	16	330	0.996178	2.05328	3.6837	3.78	462.218	46.683	117670	11767	254.578	36.1828	7.5e-06	1.5e-06	0.998091	0.00046847	5280000	330000	0.0506016	0.01	506.016	50.6016	8930000000	7220000000	66975	55782.2	5.21252e+06	334681	5.223e+06	335331	670661	0.989204
WG-PD325	39.2557	175.555	2079.09	21	357	0.991094	2.24793	4.032	4.39	536.809	54.2165	245454	24545.4	457.246	64.9877	7.5e-06	1.5e-06	0.996571	0.000841416	4440000	216000	0.0329442	0.008	263.554	26.3554	9090000000	498000000	68175	14137.3	4.37156e+06	216462	4.38687e+06	217239	434477	0.988034
WG-PD326	39.2556	175.555	2066.7			0.994994	2.29775	3.14685	4.26	520.913	52.611	245454	24545.4	471.199	66.9709	7.5e-06	1.5e-06	0.996466	0.000867093	3670000	191000	0.0329442	0.008	263.554	26.3554	11500000000	680000000	86250	17988.1	3.58349e+06	191845	3.59646e+06	192551	385102	0.979962
DC-PD327	39.2346	175.551	1600.45			0.998551	2.22481	3.51733	3.1	379.068	38.285	66521.4	6652.14	175.487	24.9417	7.5e-06	1.5e-06	0.998684	0.000322928	2820000	207000	0.0401165	0.008	320.932	32.0932	7180000000	489000000	53850	11377.3	2.76583e+06	207312	2.7698e+06	207588	415175	0.982197
DC-PD329	39.2342	175.551	1591.8			0.998551	2.36527	4.33924	3.11	380.291	38.4085	66521.4	6652.14	174.922	24.8615	7.5e-06	1.5e-06	0.998688	0.000321889	3080000	225000	0.0401165	0.008	320.932	32.0932	9750000000	488000000	73125	15076	3.00655e+06	225505	3.01082e+06	225803	451606	0.977541
DC-PD330	39.2341	175.551	1590.27			0.998551	2.21472	3.38597	3.09	377.845	38.1615	66521.4	6652.14	176.055	25.0224	7.5e-06	1.5e-06	0.99868	0.000323973	2890000	215000	0.0401165	0.008	320.932	32.0932	7990000000	526000000	59925	12617.6	2.82975e+06	215370	2.83382e+06	215657	431313	0.980559
