# Supplementary material for: Cosmogenic 3 He chronology of postglacial lava flows at Mt. Ruapehu, New Zealand
Source: Copernicus journal article supplement (doi:10.5194/egusphere-2024-163), 2024-01-23
Supplement: Supplementary file 5 [file S2-exposure-ages-various-schemes-models.xlsx]

## Sheet: Feuil1
Results computed using the CREP online calculator; https://crep.otelo.univ-lorraine.fr/#/ ; Martin et al. (2017) https://doi.org/10.1016/j.quageo.2016.11.006
	Lal-Stone Corrected Scaling Scheme	LSD Scaling Scheme	ERA40 Atmosphere Model	Standard Atmosphere Model	Muscheler Geomagnetic Framework	LSD Geomagnetic Framework	LiftonVDM2016 Geomagnetic Framework			Scaling Scheme : Lal Stone; Atmosphere Model : ERA40; Geomagnetic Database : Muscheler et al., 2005; 122.28 +/- 12.35 at/g/yr				Scaling Scheme : Lal Stone; Atmosphere Model : ERA40; Geomagnetic Database : LSD Framework; 118.08 +/- 14.27 at/g/yr				Scaling Scheme : Lal Stone; Atmosphere Model : ERA40; Geomagnetic Database : LiftonVDM2016; 120.01 +/- 13.51 at/g/yr				Scaling Scheme : Lal Stone; Atmosphere Model : Standard; Geomagnetic Database : Muscheler et al., 2005; 120.54 +/- 14.99 at/g/yr				Scaling Scheme : Lal Stone; Atmosphere Model : Standard; Geomagnetic Database : LSD Framework; 116.15 +/- 16.93 at/g/yr				Scaling Scheme : Lal Stone; Atmosphere Model : Standard; Geomagnetic Database : LiftonVDM2016; 118.16 +/- 16.16 at/g/yr				LSD scaling scheme (Lifton 2014); Atmospheric model ERA40 (Uppala), Geomagnetic Database : Muscheler et al., 2005; 123.78 +/- 10.97 at/g/yr				Scaling Scheme : LSD, Atmosphere Model : ERA40, Geomagnetic Database : LSD Framework, 119.03 +/- 11.73 at/g/yr				Scaling Scheme : LSD; Atmosphere Model : ERA40; Geomagnetic Database : LiftonVDM2016; 121.14 +/- 11.53 at/g/yr				Scaling Scheme : LSD; Atmosphere Model : Standard; Geomagnetic Database : Muscheler et al., 2005; 122.01 +/- 12.72 at/g/yr
References	Lal 1991 (https://doi.org/10.1016/0012-821X(91)90220-C) ; Stone 2000 (https://doi.org/10.1029/2000JB900181); Nishiizumi 1989 (https://doi.org/10.1029/jb094ib12p17907); Balco et al. 2008 (https://doi.org/10.1016/j.quageo.2007.12.001)	Lifton et al. 2014 (https://doi.org/10.1016/j.epsl.2013.10.052)	Uppala et al. 2005 (https://dx.doi.org/10.1256/qj.04.176)	N.O.A.A, 1976. U.S. Standard Atmosphere. US Gov. Print. Off.	Muscheler et al. 2005 (https://dx.doi.org/10.1016/ j.quascirev.2005.01.012)	Lifton et al. 2014 (https://dx.doi.org/10.1016/j.epsl.2013.10.052)	Lifton 2016 (https://dx.doi.org/10.1016/j.epsl.2015.11.006)	Scaling Scheme		Lal-Stone Corrected																								LSD
								Atmosphere Model		ERA40												Standard												ERA40												Standard
								Geomagnetic Database		Muscheler et al., 2005				LSD Framework				LiftonVDM2016				Muscheler et al., 2005				LSD Framework				LiftonVDM2016				Muscheler et al., 2005				LSD Framework				LiftonVDM2016				Muscheler et al., 2005
								Production rate SLHL		122.28 +/- 12.35 at/g/yr				118.08 +/- 14.27 at/g/yr				120.01 +/- 13.51 at/g/yr				120.54 +/- 14.99 at/g/yr				116.15 +/- 16.93 at/g/yr				118.16 +/- 16.16 at/g/yr				123.78 +/- 10.97 at/g/yr				119.03 +/- 11.73 at/g/yr				121.14 +/- 11.53 at/g/yr				122.01 +/- 12.72 at/g/yr
Sample	Lat (dec°)	Lon (dec°)	Alt (masl)	Conc (at/g)	1s (at/g)	Shield. Corr	Density g/cm3	Thickness (cm)	Erosion. (cm/yr)	Scaling Factor	Age(ka)	1σ (ka)	1σ without PR error	Scaling Factor	Age(ka)	1σ (ka)	1σ without PR error	Scaling Factor	Age(ka)	1σ (ka)	1σ without PR error	Scaling Factor	Age(ka)	1σ (ka)	1σ without PR error	Scaling Factor	Age(ka)	1σ (ka)	1σ without PR error	Scaling Factor	Age(ka)	1σ (ka)	1σ without PR error	Scaling Factor	Age(ka)	1σ (ka)	1σ without PR error	Scaling Factor	Age(ka)	1σ (ka)	1σ without PR error	Scaling Factor	Age(ka)	1σ (ka)	1σ without PR error	Scaling Factor	Age(ka)	1σ (ka)	1σ without PR error
SCPD001	-39.2143	175.601	1438.96	3.49299e+06	291036	0.998149	1.89091	3.60981	0	2.83	10.33	1.24	0.79	2.96	10.22	1.54	0.88	2.88	10.51	1.45	0.79	2.85	10.41	1.43	0.79	2.98	9.94	1.53	0.86	2.9	10.62	1.7	0.8	2.78	10.39	1.14	0.78	3.18	9.44	1.39	0.9	2.82	10.45	1.22	0.78	2.8	10.47	1.27	0.78
SCPD002	-39.2143	175.601	1439.33	3.39049e+06	267215	0.998149	2.01042	3.17036	0	2.82	10.04	1.18	0.73	2.97	9.9	1.47	0.81	2.87	10.21	1.4	0.76	2.84	10.11	1.37	0.74	2.99	9.61	1.46	0.79	2.9	10.3	1.63	0.75	2.77	10.11	1.09	0.72	3.2	9.11	1.3	0.83	2.81	10.16	1.19	0.75	2.79	10.17	1.2	0.73
SCPD003	-39.2146	175.6	1443.3	3.18276e+06	255100	0.998149	2.01064	2.35345	0	2.82	9.39	1.12	0.7	2.99	9.18	1.38	0.77	2.87	9.54	1.36	0.76	2.84	9.46	1.3	0.71	3.01	8.91	1.36	0.75	2.89	9.64	1.55	0.77	2.76	9.46	1.04	0.7	3.25	8.37	1.18	0.75	2.81	9.5	1.18	0.78	2.79	9.52	1.15	0.7
SCPD093	-39.2115	175.614	1308.18	2.93127e+06	220769	0.992567	2.3	2.59294	0	2.56	9.62	1.13	0.68	2.7	9.45	1.39	0.74	2.6	9.8	1.36	0.72	2.57	9.69	1.3	0.68	2.72	9.18	1.37	0.72	2.62	9.89	1.56	0.72	2.48	9.79	1.04	0.67	2.89	8.75	1.23	0.75	2.52	9.86	1.18	0.72	2.5	9.85	1.16	0.68
WPPD007	-39.2479	175.588	1911.73	5.59211e+06	231657	0.996085	2.13253	3.2475	0	4.02	11.68	1.18	0.44	4.15	11.7	1.49	0.48	4.09	11.87	1.42	0.48	4.04	11.79	1.44	0.45	4.17	11.4	1.49	0.47	4.12	12	1.71	0.5	4.07	11.4	1.01	0.42	4.57	10.54	1.26	0.49	4.14	11.44	1.12	0.41	4.09	11.48	1.17	0.43
WPPD008	-39.2479	175.588	1912.06	5.12512e+06	226177	0.995222	2.06228	3.02294	0	3.99	10.77	1.08	0.43	4.16	10.7	1.4	0.48	4.05	10.97	1.3	0.42	4.01	10.87	1.31	0.43	4.18	10.42	1.41	0.47	4.08	11.07	1.58	0.42	4.03	10.53	0.94	0.41	4.64	9.5	1.19	0.49	4.09	10.59	1	0.43	4.06	10.61	1.08	0.42
BRPD014	-39.2201	175.541	1360.02	2.28806e+06	124611	0.999203	2.15385	2.7298	0	2.6	7.34	0.74	0.35	2.82	7.01	0.87	0.36	2.71	7.3	0.9	0.37	2.62	7.39	0.89	0.35	2.83	6.84	0.86	0.34	2.73	7.36	1.07	0.37	2.52	7.48	0.65	0.34	3.05	6.43	0.66	0.32	2.63	7.32	0.72	0.34	2.54	7.52	0.74	0.34
BRPD016	-39.2198	175.538	1359.23	2.46504e+06	137065	0.981487	2.32184	2.63267	0	2.62	7.98	0.84	0.4	2.82	7.69	1.01	0.42	2.71	7.98	1.04	0.43	2.64	8.04	1	0.41	2.84	7.49	0.99	0.42	2.74	8.06	1.25	0.44	2.55	8.1	0.75	0.4	3.06	7.02	0.78	0.39	2.65	7.98	0.83	0.42	2.57	8.16	0.86	0.4
BRPD017	-39.219	175.541	1332.59	2.34993e+06	141564	0.998016	2.25134	2.70558	0	2.56	7.67	0.81	0.41	2.76	7.36	0.96	0.43	2.66	7.63	0.98	0.44	2.58	7.72	0.96	0.42	2.78	7.16	0.94	0.41	2.68	7.71	1.17	0.44	2.48	7.8	0.72	0.4	2.99	6.74	0.74	0.39	2.59	7.65	0.79	0.42	2.51	7.85	0.82	0.41
BRPD018	-39.219	175.541	1332.43	2.7889e+06	162307	0.998103	2.14737	4.32904	0	2.59	9.07	0.99	0.5	2.75	8.84	1.22	0.53	2.65	9.18	1.22	0.56	2.61	9.14	1.17	0.5	2.78	8.59	1.21	0.52	2.67	9.28	1.44	0.56	2.52	9.22	0.9	0.5	2.97	8.14	1.03	0.52	2.58	9.21	1.04	0.58	2.54	9.28	1.02	0.5
GRPD023	-39.3074	175.562	2147.25	7.52439e+06	493705	0.920611	2.2381	4.46078	0	4.78	14.42	1.58	0.85	4.92	14.52	1.91	0.9	4.86	14.68	1.87	0.88	4.8	14.56	1.87	0.86	4.93	14.18	1.91	0.89	4.89	14.85	2.2	0.9	4.92	13.84	1.39	0.84	5.4	13.11	1.58	0.89	5.01	13.9	1.46	0.84	4.95	13.96	1.56	0.83
GRPD024	-39.3074	175.562	2145.37	6.09689e+06	388741	0.990045	2.17582	4.60611	0	4.69	11.07	1.2	0.64	4.88	11.02	1.52	0.71	4.79	11.24	1.43	0.64	4.72	11.16	1.44	0.64	4.91	10.73	1.53	0.7	4.82	11.35	1.68	0.65	4.82	10.64	1.04	0.6	5.54	9.64	1.3	0.71	4.9	10.71	1.1	0.6	4.85	10.74	1.18	0.61
GRPD025	-39.3078	175.561	2128.1	3.47125e+06	246862	0.99253	2.8	4.7235	0	4.41	6.76	0.71	0.41	4.83	6.39	0.79	0.39	4.63	6.67	0.84	0.42	4.43	6.82	0.83	0.41	4.84	6.25	0.78	0.39	4.66	6.73	0.99	0.43	4.44	6.63	0.6	0.38	5.51	5.55	0.62	0.36	4.69	6.41	0.65	0.39	4.47	6.68	0.68	0.38
RTPD027	-39.314	175.551	1831.43	6.25651e+06	253723	0.996664	1.83811	5.47611	0	3.83	13.83	1.4	0.52	3.95	13.9	1.7	0.54	3.9	14.05	1.67	0.53	3.85	13.94	1.69	0.52	3.96	13.56	1.7	0.54	3.93	14.2	2.02	0.54	3.87	13.52	1.23	0.51	4.25	12.81	1.4	0.54	3.93	13.6	1.3	0.5	3.89	13.64	1.41	0.51
RTPD028	-39.314	175.551	1833.06	5.57647e+06	260432	0.996378	1.78986	5.33429	0	3.82	12.34	1.3	0.55	3.94	12.38	1.58	0.56	3.87	12.6	1.53	0.57	3.84	12.45	1.56	0.56	3.96	12.08	1.59	0.55	3.89	12.74	1.82	0.57	3.86	12.07	1.12	0.52	4.28	11.32	1.33	0.57	3.91	12.16	1.2	0.58	3.88	12.17	1.3	0.53
RTPD029	-39.314	175.551	1832.92	6.25899e+06	365229	0.996378	1.83811	5.32946	0	3.84	13.81	1.5	0.75	3.95	13.89	1.79	0.78	3.91	14.04	1.76	0.76	3.86	13.93	1.77	0.75	3.97	13.55	1.79	0.77	3.93	14.19	2.1	0.77	3.87	13.5	1.33	0.74	4.26	12.78	1.51	0.77	3.94	13.58	1.41	0.71	3.9	13.62	1.5	0.74
RTPD030	-39.3143	175.551	1816.39	6.38377e+06	306754	0.988054	1.88636	5.04964	0	3.8	14.31	1.47	0.62	3.91	14.42	1.8	0.65	3.87	14.57	1.76	0.64	3.83	14.43	1.76	0.62	3.93	14.06	1.79	0.65	3.89	14.73	2.11	0.65	3.84	14	1.29	0.61	4.19	13.33	1.48	0.66	3.9	14.09	1.36	0.62	3.86	14.13	1.47	0.61
RTPD045	-39.3234	175.552	1585.95	6.17077e+06	379564	0.991255	2.8	4.23172	0	3.27	16.14	1.73	0.9	3.34	16.39	2.1	0.96	3.31	16.52	2.1	0.96	3.29	16.28	2.05	0.91	3.35	15.98	2.1	0.94	3.33	16.71	2.47	0.97	3.26	16	1.54	0.88	3.5	15.52	1.78	0.94	3.3	16.18	1.69	0.93	3.28	16.12	1.74	0.88
RTPD046.M	-39.3249	175.551	1567.56	6.0296e+06	266247	0.978587	2.07087	3.61406	0	3.22	16	1.6	0.64	3.29	16.23	1.98	0.69	3.26	16.36	1.98	0.69	3.24	16.13	1.93	0.64	3.31	15.82	1.98	0.67	3.28	16.53	2.36	0.69	3.21	15.86	1.4	0.62	3.45	15.36	1.64	0.67	3.25	16.04	1.55	0.67	3.23	15.99	1.61	0.63
RTPD047	-39.3251	175.55	1567.39	5.83295e+06	288954	0.997456	2.2716	3.03016	0	3.21	15.24	1.55	0.68	3.28	15.41	1.92	0.72	3.26	15.54	1.9	0.72	3.23	15.36	1.87	0.68	3.3	15.03	1.92	0.7	3.28	15.7	2.26	0.73	3.19	15.12	1.36	0.66	3.44	14.58	1.6	0.71	3.24	15.24	1.51	0.68	3.22	15.23	1.56	0.66
RTPD048	-39.325	175.55	1567.29	2.96082e+06	158250	0.997456	2.18868	3.37521	0	3.06	8.11	0.85	0.4	3.3	7.79	1.02	0.41	3.18	8.09	1.06	0.42	3.08	8.17	1.01	0.4	3.32	7.6	1.01	0.4	3.19	8.19	1.26	0.43	3.02	8.11	0.74	0.38	3.64	7.01	0.78	0.37	3.14	7.98	0.83	0.41	3.04	8.18	0.85	0.39
NRPD053	-39.3381	175.587	1369.76	1.60464e+07	672514	0.995825	2.38938	4.83258	0	2.94	46.5	5.52	2.1	3.07	46.14	5.84	1.93	2.94	48.04	6.73	2.35	2.95	46.9	6.53	2.16	3.08	44.94	5.75	1.82	2.96	48.66	7.93	2.38	2.92	46.16	5.07	2.11	3.11	45.09	4.75	1.86	2.94	46.91	5.53	2.36	2.94	46.53	5.74	2.17
NRPD054	-39.3384	175.588	1372.88	1.51872e+07	635036	0.999856	2.06098	4.20833	0	2.95	43.3	4.57	1.74	3.06	43.12	5.26	1.68	2.98	44.39	5.85	1.88	2.96	43.67	5.7	1.78	3.08	42.06	5.19	1.62	3	44.85	7.08	1.95	2.93	42.99	3.91	1.69	3.11	42.18	4.24	1.62	2.96	43.5	4.59	1.77	2.95	43.33	4.7	1.73
NRPD055	-39.3384	175.588	1372.47	1.44935e+07	619967	0.999432	2.15094	3.21689	0	2.93	41.35	4.14	1.52	3.05	41.12	4.9	1.61	2.97	42.21	5.32	1.68	2.95	41.64	5.08	1.55	3.06	40.13	4.87	1.57	2.99	42.65	6.52	1.72	2.91	41.17	3.58	1.43	3.09	40.24	3.99	1.57	2.95	41.44	3.97	1.56	2.93	41.42	4.17	1.46
NRPD057	-39.3384	175.588	1372.58	1.46321e+07	626634	0.995308	2.46721	3.49706	0	2.94	42.03	4.25	1.61	3.06	41.83	5.03	1.64	2.97	42.99	5.52	1.76	2.96	42.33	5.29	1.66	3.07	40.82	4.98	1.59	2.99	43.43	6.71	1.81	2.92	41.79	3.68	1.51	3.1	40.93	4.08	1.6	2.96	42.16	4.16	1.64	2.94	42.07	4.29	1.56
MAPD058	-39.3125	175.612	1570.71	1.96804e+07	836241	0.996354	2.45342	2.88062	0	3.39	48.75	5.87	2.57	3.56	48	6.19	2.1	3.4	50.32	7.11	2.47	3.4	49.26	6.99	2.61	3.59	46.7	6.1	2	3.41	50.96	8.33	2.51	3.43	47.62	5.3	2.45	3.67	46.28	4.99	2	3.43	48.63	5.87	2.55	3.44	48.16	6.03	2.57
MAPD059	-39.3125	175.612	1569.32	2.34345e+07	1.19176e+06	0.997705	2.20833	3.19481	0	3.35	58.65	6.41	2.8	3.54	57.48	7.52	2.92	3.36	60.54	7.63	2.83	3.37	59.11	7.73	2.83	3.56	55.97	7.56	2.88	3.38	61.14	9.2	2.83	3.35	57.86	5.69	2.75	3.63	55.63	6.31	2.9	3.36	59.07	6.18	2.83	3.38	58.27	6.53	2.76
MFPD061	-39.3169	175.514	1437.04	4.78539e+06	265304	0.970758	2.15238	3.02573	0	2.89	14.23	1.51	0.72	2.97	14.34	1.83	0.76	2.94	14.49	1.8	0.74	2.91	14.33	1.8	0.72	2.99	13.98	1.83	0.74	2.96	14.64	2.14	0.75	2.85	14.25	1.36	0.71	3.09	13.66	1.55	0.77	2.89	14.35	1.44	0.72	2.87	14.35	1.54	0.71
MFPD063	-39.3168	175.515	1434.84	3.84374e+06	226082	0.991208	1.8125	3.77465	0	2.85	11.35	1.23	0.61	2.95	11.36	1.53	0.67	2.91	11.53	1.46	0.63	2.87	11.44	1.46	0.61	2.97	11.06	1.53	0.65	2.93	11.64	1.72	0.64	2.81	11.4	1.11	0.61	3.13	10.62	1.35	0.7	2.86	11.45	1.21	0.61	2.83	11.49	1.26	0.61
MFPD064	-39.3167	175.515	1433.79	3.9645e+06	218015	0.987327	1.94595	3.57218	0	2.86	11.73	1.26	0.6	2.95	11.77	1.55	0.64	2.91	11.93	1.49	0.65	2.88	11.82	1.5	0.61	2.97	11.46	1.55	0.63	2.93	12.06	1.77	0.66	2.81	11.78	1.14	0.59	3.11	11.07	1.35	0.67	2.86	11.85	1.21	0.63	2.83	11.87	1.3	0.6
MFPD065	-39.3167	175.515	1433.29	4.3449e+06	246159	0.987978	1.80172	2.595	0	2.87	12.71	1.4	0.69	2.96	12.79	1.67	0.71	2.91	12.98	1.65	0.7	2.89	12.83	1.65	0.7	2.97	12.46	1.68	0.69	2.93	13.1	1.93	0.7	2.82	12.76	1.26	0.69	3.1	12.09	1.44	0.71	2.86	12.89	1.35	0.7	2.84	12.86	1.43	0.7
TCPD066	-39.3014	175.519	1533.19	4.05846e+06	205955	0.997377	2.16509	6.22944	0	3.07	11.32	1.18	0.52	3.17	11.32	1.48	0.58	3.13	11.49	1.42	0.54	3.08	11.41	1.42	0.53	3.19	11.03	1.49	0.56	3.15	11.61	1.68	0.55	3.03	11.31	1.05	0.52	3.4	10.49	1.3	0.6	3.09	11.35	1.15	0.51	3.06	11.38	1.2	0.52
TCPD067	-39.3015	175.519	1533.56	5.16181e+06	257987	0.997377	2.11207	4.46456	0	3.1	14.06	1.47	0.65	3.19	14.15	1.78	0.68	3.16	14.3	1.75	0.67	3.12	14.18	1.75	0.65	3.2	13.81	1.77	0.67	3.17	14.46	2.09	0.67	3.07	14.01	1.3	0.64	3.35	13.37	1.5	0.68	3.12	14.09	1.37	0.65	3.09	14.12	1.49	0.64
TCPD068	-39.3015	175.519	1533.09	4.66484e+06	228954	0.997377	2.14516	7.41329	0	3.09	13.02	1.38	0.61	3.18	13.09	1.66	0.63	3.14	13.26	1.65	0.6	3.1	13.13	1.65	0.62	3.2	12.75	1.66	0.62	3.16	13.4	1.94	0.6	3.06	12.98	1.24	0.61	3.36	12.3	1.41	0.62	3.1	13.08	1.32	0.6	3.08	13.08	1.41	0.61
TCPD070	-39.3012	175.519	1528	4.83559e+06	232697	0.997377	1.9871	4.32687	0	3.08	13.24	1.39	0.61	3.17	13.3	1.68	0.63	3.13	13.47	1.66	0.6	3.09	13.35	1.66	0.61	3.19	12.97	1.68	0.61	3.15	13.62	1.98	0.61	3.05	13.2	1.25	0.61	3.34	12.52	1.42	0.62	3.09	13.3	1.34	0.58	3.07	13.31	1.42	0.61
WTPD073	-39.2569	175.543	1892.38	5.9971e+06	283801	0.986899	2.08556	3.53265	0	3.98	12.78	1.35	0.58	4.11	12.81	1.62	0.6	4.05	13.01	1.6	0.58	4	12.89	1.6	0.59	4.13	12.5	1.63	0.58	4.07	13.16	1.89	0.58	4.04	12.45	1.18	0.56	4.46	11.72	1.36	0.58	4.08	12.58	1.26	0.58	4.06	12.54	1.35	0.57
WTPD074	-39.2569	175.543	1892.54	6.31925e+06	264894	0.991209	2.14912	3.42881	0	3.99	13.39	1.37	0.54	4.11	13.45	1.65	0.55	4.06	13.62	1.63	0.53	4.01	13.51	1.65	0.53	4.13	13.11	1.66	0.54	4.08	13.76	1.96	0.54	4.04	13.03	1.2	0.53	4.45	12.31	1.38	0.53	4.1	13.12	1.29	0.5	4.07	13.15	1.38	0.53
WTPD075	-39.256	175.54	1784.99	5.98154e+06	265381	0.990393	2.33577	3.59817	0	3.7	13.7	1.41	0.57	3.81	13.77	1.7	0.59	3.77	13.93	1.67	0.58	3.72	13.82	1.69	0.57	3.83	13.43	1.71	0.58	3.79	14.08	2.02	0.58	3.72	13.45	1.24	0.56	4.09	12.73	1.42	0.58	3.78	13.52	1.33	0.54	3.75	13.55	1.42	0.57
PRPD083	-39.237	175.567	1730.69	8.92607e+06	453749	0.979067	2.27907	3.538	0	3.71	20.62	2.16	0.96	3.77	20.98	2.5	0.95	3.74	21.19	2.52	0.95	3.73	20.78	2.63	0.97	3.79	20.49	2.5	0.92	3.76	21.39	3	0.96	3.74	20.18	1.85	0.92	3.95	19.91	2.03	0.92	3.76	20.53	1.96	0.92	3.77	20.33	2.13	0.93
PRPD084	-39.2386	175.569	1860.87	8.8664e+06	460735	0.987674	2.18333	4.66036	0	4.03	18.8	1.93	0.88	4.09	19.17	2.28	0.89	4.06	19.32	2.31	0.92	4.05	18.96	2.32	0.88	4.11	18.72	2.3	0.89	4.09	19.53	2.75	0.93	4.09	18.3	1.68	0.84	4.34	17.93	1.91	0.9	4.12	18.58	1.84	0.88	4.12	18.44	1.92	0.85
PRPD085	-39.2385	175.569	1857.91	1.02816e+07	503561	0.997029	2.11644	4.25192	0	4.07	21.31	2.28	0.97	4.15	21.65	2.57	0.97	4.11	21.85	2.58	0.95	4.09	21.49	2.78	0.98	4.16	21.15	2.56	0.93	4.14	22.07	3.08	0.96	4.14	20.68	1.91	0.92	4.37	20.39	2.07	0.9	4.16	21.03	1.99	0.89	4.17	20.84	2.22	0.92
TFPD088	-39.2067	175.567	1308.16	4.53873e+06	290888	0.999117	2.39286	3.75195	0	2.63	14.54	1.6	0.84	2.69	14.68	1.93	0.89	2.67	14.83	1.9	0.88	2.65	14.64	1.89	0.85	2.71	14.3	1.92	0.87	2.69	14.95	2.23	0.89	2.57	14.69	1.44	0.83	2.78	14.14	1.66	0.9	2.6	14.82	1.56	0.87	2.59	14.79	1.63	0.83
TFPD090	-39.206	175.567	1290.42	4.31556e+06	271214	0.996052	2.31034	4.999	0	2.59	14.2	1.56	0.82	2.66	14.32	1.88	0.85	2.63	14.46	1.84	0.84	2.61	14.3	1.84	0.82	2.67	13.94	1.87	0.84	2.65	14.6	2.18	0.85	2.53	14.37	1.41	0.81	2.73	13.8	1.62	0.88	2.56	14.49	1.51	0.82	2.54	14.46	1.59	0.81
TFPD091	-39.2059	175.566	1288.15	4.61659e+06	288337	0.998828	2.22951	4.2009	0	2.6	14.99	1.62	0.84	2.66	15.15	1.97	0.9	2.64	15.28	1.95	0.9	2.62	15.09	1.92	0.85	2.67	14.77	1.97	0.87	2.66	15.41	2.3	0.9	2.54	15.15	1.46	0.83	2.73	14.64	1.7	0.9	2.57	15.28	1.61	0.88	2.56	15.25	1.65	0.84
TSPD205	-39.2761	175.602	1905.05	3.94821e+06	224630	0.982594	2.12167	5.5788	0	3.9	8.73	0.93	0.46	4.19	8.43	1.16	0.49	4.03	8.77	1.19	0.53	3.92	8.81	1.12	0.46	4.21	8.21	1.15	0.47	4.04	8.88	1.38	0.54	3.94	8.54	0.82	0.44	4.74	7.38	0.86	0.44	4.1	8.4	0.96	0.48	3.96	8.62	0.92	0.45
TSPD206	-39.2761	175.602	1905.87	4.40666e+06	235477	0.997086	2.20879	4.8358	0	3.93	9.51	1.01	0.48	4.17	9.28	1.28	0.52	4	9.67	1.26	0.51	3.95	9.59	1.2	0.48	4.2	9.02	1.27	0.51	4.02	9.79	1.46	0.5	3.97	9.29	0.89	0.46	4.72	8.13	1.01	0.48	4.06	9.3	1.02	0.54	3.99	9.38	1	0.46
TSPD207	-39.2761	175.602	1905.49	4.57572e+06	233576	0.997086	2.37	4.15525	0	3.94	9.83	1.03	0.46	4.16	9.63	1.31	0.52	4.01	10	1.26	0.48	3.96	9.92	1.22	0.47	4.19	9.37	1.31	0.5	4.03	10.1	1.49	0.48	3.98	9.6	0.9	0.45	4.7	8.46	1.06	0.49	4.04	9.66	1.05	0.49	4	9.69	1.03	0.45
TSPD209	-39.2815	175.599	1932.53	5060000	311532	0.996907	2.19788	2.42476	0	4.03	10.46	1.13	0.59	4.23	10.34	1.44	0.66	4.1	10.65	1.33	0.59	4.05	10.56	1.34	0.59	4.25	10.07	1.45	0.65	4.13	10.77	1.6	0.59	4.09	10.2	0.99	0.57	4.74	9.15	1.22	0.66	4.16	10.24	1.08	0.58	4.11	10.29	1.12	0.57
TSPD210	-39.2815	175.599	1935.04	5.76026e+06	280217	0.98868	2.13861	2.90487	0	4.09	11.87	1.24	0.54	4.23	11.9	1.54	0.56	4.16	12.09	1.47	0.59	4.11	11.98	1.5	0.55	4.25	11.61	1.54	0.56	4.18	12.23	1.75	0.59	4.15	11.56	1.06	0.51	4.65	10.74	1.31	0.58	4.23	11.6	1.17	0.52	4.18	11.65	1.23	0.52
TSPD211	-39.2816	175.599	1929.21	5.7263e+06	280608	0.992742	2.25714	3.67811	0	4.08	11.87	1.25	0.55	4.21	11.9	1.54	0.57	4.15	12.09	1.48	0.59	4.1	11.99	1.5	0.55	4.23	11.62	1.55	0.56	4.17	12.23	1.75	0.6	4.13	11.57	1.07	0.51	4.63	10.74	1.31	0.59	4.21	11.61	1.17	0.52	4.16	11.67	1.23	0.52
TFPD212	-39.2726	175.626	1521.19	2.6424e+06	203867	0.993525	2.06716	5.85288	0	2.94	7.67	0.87	0.53	3.18	7.35	1.02	0.55	3.06	7.63	1.05	0.56	2.96	7.73	1.01	0.53	3.2	7.16	0.99	0.52	3.08	7.71	1.23	0.57	2.89	7.72	0.77	0.5	3.49	6.65	0.79	0.47	3.02	7.55	0.84	0.53	2.91	7.77	0.87	0.51
TFPD213	-39.2726	175.626	1521.96	3.78791e+06	274882	0.997754	2.13714	6.47738	0	3.02	10.73	1.22	0.71	3.15	10.66	1.53	0.79	3.07	10.92	1.44	0.71	3.04	10.81	1.43	0.71	3.17	10.38	1.53	0.77	3.1	11.02	1.7	0.72	2.99	10.72	1.11	0.7	3.39	9.83	1.37	0.82	3.03	10.81	1.17	0.69	3.01	10.8	1.24	0.7
TFPD214	-39.2723	175.627	1506.44	2.42251e+06	137670	0.987974	2.22692	6.4524	0	2.89	7.25	0.74	0.36	3.14	6.91	0.86	0.36	3.01	7.2	0.89	0.37	2.91	7.3	0.88	0.36	3.16	6.74	0.85	0.34	3.04	7.27	1.05	0.38	2.83	7.33	0.64	0.34	3.43	6.28	0.65	0.32	2.95	7.17	0.7	0.35	2.85	7.37	0.72	0.34
MNPD217	-39.2829	175.532	1815.94	3.47022e+06	242337	0.99294	2.10909	2.6236	0	3.64	7.98	0.88	0.5	3.94	7.65	1.05	0.53	3.78	7.96	1.09	0.53	3.67	8.04	1.04	0.51	3.96	7.45	1.03	0.52	3.8	8.05	1.29	0.55	3.65	7.88	0.76	0.47	4.42	6.75	0.78	0.45	3.81	7.7	0.84	0.49	3.67	7.93	0.86	0.48
MNPD218	-39.2829	175.532	1813.91	3.7953e+06	233346	0.99294	2.24038	5.19289	0	3.67	8.84	0.97	0.51	3.93	8.54	1.19	0.54	3.78	8.89	1.21	0.58	3.69	8.91	1.15	0.51	3.95	8.32	1.18	0.53	3.79	9.01	1.41	0.59	3.69	8.68	0.86	0.49	4.41	7.55	0.91	0.49	3.81	8.58	1	0.55	3.7	8.77	0.97	0.5
MNPD219	-39.2829	175.532	1812.11	2.45456e+06	191299	0.99294	2.22363	3.98514	0	3.48	5.98	0.65	0.39	3.81	5.65	0.72	0.39	3.67	5.86	0.75	0.41	3.5	6.02	0.75	0.4	3.82	5.52	0.71	0.38	3.69	5.92	0.87	0.41	3.42	6	0.57	0.37	4.31	4.96	0.61	0.38	3.63	5.77	0.6	0.38	3.45	6.04	0.64	0.38
MNPD220	-39.2829	175.532	1817.5	3.88171e+06	254384	0.99294	2.06289	3.21594	0	3.68	8.88	0.99	0.54	3.94	8.59	1.22	0.58	3.78	8.94	1.23	0.62	3.7	8.95	1.16	0.54	3.96	8.36	1.2	0.56	3.8	9.05	1.44	0.63	3.69	8.73	0.88	0.53	4.42	7.58	0.94	0.53	3.83	8.61	1.03	0.6	3.72	8.79	0.99	0.53
MNPD221	-39.2829	175.533	1822.79	3.2918e+06	204254	0.99294	2.2	4.02536	0	3.65	7.65	0.81	0.42	3.96	7.29	0.95	0.44	3.8	7.59	0.98	0.45	3.67	7.71	0.96	0.42	3.98	7.11	0.94	0.42	3.82	7.68	1.17	0.45	3.64	7.57	0.68	0.39	4.44	6.45	0.69	0.36	3.81	7.38	0.75	0.4	3.67	7.62	0.77	0.4
MSPD222	-39.2845	175.53	1750.57	2.54464e+06	159422	0.954534	2.23316	4.96854	0	3.39	6.65	0.68	0.35	3.71	6.3	0.76	0.35	3.56	6.56	0.81	0.37	3.42	6.7	0.8	0.36	3.72	6.16	0.75	0.34	3.58	6.63	0.95	0.37	3.34	6.67	0.59	0.34	4.12	5.63	0.6	0.31	3.53	6.46	0.63	0.34	3.37	6.71	0.66	0.35
MSPD223	-39.2845	175.531	1751.37	2.50341e+06	166288	0.992308	2.41176	4.00989	0	3.37	6.31	0.65	0.36	3.68	5.98	0.72	0.34	3.54	6.23	0.76	0.36	3.38	6.37	0.77	0.36	3.69	5.85	0.72	0.33	3.56	6.28	0.9	0.37	3.31	6.35	0.57	0.34	4.1	5.33	0.6	0.34	3.5	6.13	0.61	0.35	3.33	6.39	0.64	0.34
MSPD224	-39.2845	175.53	1750.94	2.05121e+06	163537	0.992308	2.32836	4.10403	0	3.27	5.32	0.6	0.37	3.6	5.01	0.65	0.37	3.46	5.21	0.68	0.38	3.29	5.37	0.69	0.37	3.61	4.89	0.65	0.35	3.48	5.27	0.79	0.37	3.19	5.39	0.53	0.36	4.11	4.36	0.55	0.34	3.39	5.18	0.56	0.36	3.21	5.43	0.59	0.36
CTPD229	-39.2958	175.539	1924.04	6.4106e+06	335868	0.995813	1.96316	3.15022	0	4.08	13.17	1.41	0.66	4.2	13.22	1.68	0.68	4.15	13.4	1.67	0.64	4.1	13.29	1.67	0.67	4.22	12.89	1.69	0.66	4.17	13.56	1.97	0.65	4.15	12.79	1.23	0.64	4.57	12.06	1.42	0.65	4.2	12.91	1.32	0.64	4.17	12.9	1.41	0.65
CTPD230	-39.2959	175.54	1925.05	6.7407e+06	361486	0.995875	2.20645	2.88229	0	4.09	13.81	1.47	0.69	4.21	13.89	1.76	0.71	4.16	14.04	1.73	0.7	4.11	13.94	1.74	0.69	4.23	13.54	1.76	0.71	4.19	14.19	2.07	0.7	4.15	13.43	1.29	0.68	4.57	12.68	1.47	0.7	4.22	13.51	1.38	0.65	4.18	13.53	1.46	0.68
CTPD231	-39.2998	175.539	1877.53	2.06433e+06	140729	0.995679	2.21538	3.41317	0	3.54	4.91	0.53	0.3	3.91	4.6	0.58	0.28	3.76	4.78	0.62	0.3	3.56	4.95	0.63	0.3	3.92	4.49	0.58	0.28	3.77	4.84	0.72	0.31	3.47	4.95	0.48	0.29	4.53	3.94	0.46	0.26	3.7	4.73	0.51	0.29	3.49	4.99	0.54	0.3
CTPD232	-39.3001	175.539	1873.18	3.95196e+06	237770	0.991025	2.13889	4.1405	0	3.82	8.77	0.95	0.49	4.1	8.47	1.17	0.53	3.94	8.81	1.2	0.56	3.84	8.85	1.13	0.49	4.12	8.25	1.16	0.5	3.95	8.93	1.4	0.58	3.86	8.59	0.83	0.48	4.63	7.45	0.88	0.46	4	8.46	0.98	0.53	3.87	8.67	0.95	0.48
CTPD233	-39.3001	175.539	1872.03	3.79719e+06	252948	0.994128	2.17	2.83466	0	3.81	8.36	0.93	0.51	4.1	8.04	1.12	0.54	3.94	8.36	1.16	0.56	3.83	8.43	1.09	0.52	4.12	7.83	1.1	0.52	3.96	8.46	1.36	0.58	3.83	8.21	0.81	0.49	4.64	7.06	0.83	0.47	3.99	8.06	0.91	0.52	3.86	8.27	0.91	0.5
CTPD234-M	-39.3003	175.539	1873.39	3.83649e+06	249987	0.995679	2.15179	3.16138	0	3.81	8.44	0.93	0.51	4.1	8.12	1.13	0.54	3.95	8.45	1.17	0.56	3.84	8.51	1.1	0.51	4.13	7.91	1.12	0.52	3.96	8.55	1.37	0.57	3.84	8.28	0.81	0.48	4.64	7.13	0.84	0.47	3.99	8.14	0.93	0.52	3.86	8.35	0.91	0.49
LCPD254	-39.2718	175.605	1827.1	5.04763e+06	365185	0.996536	2.01471	5.41518	0	3.78	11.34	1.3	0.75	3.92	11.33	1.6	0.82	3.85	11.51	1.52	0.77	3.8	11.44	1.53	0.76	3.94	11.04	1.6	0.81	3.88	11.63	1.77	0.79	3.8	11.13	1.15	0.72	4.3	10.24	1.41	0.84	3.87	11.17	1.23	0.72	3.83	11.21	1.29	0.73
LCPD255	-39.2718	175.605	1826.64	4.8876e+06	356684	0.996536	2.06548	6.4345	0	3.77	11.1	1.27	0.73	3.92	11.05	1.57	0.81	3.84	11.26	1.49	0.75	3.79	11.19	1.49	0.74	3.94	10.77	1.58	0.8	3.87	11.37	1.73	0.76	3.79	10.88	1.12	0.71	4.31	9.96	1.39	0.83	3.85	10.96	1.19	0.71	3.82	10.97	1.26	0.72
LCPD256	-39.2718	175.605	1825.62	3.88758e+06	289429	0.996178	2.07965	6.03525	0	3.7	8.97	1.04	0.62	3.95	8.69	1.27	0.67	3.8	9.05	1.28	0.71	3.72	9.05	1.21	0.63	3.98	8.46	1.26	0.65	3.81	9.17	1.48	0.71	3.72	8.82	0.93	0.6	4.45	7.66	1	0.6	3.84	8.72	1.09	0.69	3.74	8.9	1.04	0.61
LCPD257	-39.2718	175.605	1824.68	5.22249e+06	335331	0.996178	2.05	3.6837	0	3.78	11.61	1.29	0.69	3.91	11.63	1.58	0.74	3.85	11.79	1.51	0.73	3.8	11.72	1.53	0.69	3.93	11.33	1.59	0.72	3.87	11.93	1.78	0.75	3.81	11.38	1.13	0.66	4.27	10.55	1.38	0.76	3.88	11.43	1.24	0.66	3.83	11.48	1.29	0.67
WGPD325	-39.2557	175.555	2079.09	4.3866e+06	217239	0.991094	2.24793	4.032	0	4.38	8.49	0.88	0.39	4.73	8.16	1.08	0.41	4.54	8.49	1.13	0.43	4.41	8.56	1.05	0.39	4.75	7.95	1.07	0.4	4.56	8.6	1.33	0.44	4.47	8.23	0.74	0.36	5.43	7.04	0.77	0.34	4.66	8.07	0.84	0.38	4.5	8.29	0.85	0.37
WGPD326	-39.2556	175.555	2066.7	3.5962e+06	192551	0.994994	2.29775	3.14685	0	4.26	7.1	0.7	0.33	4.66	6.72	0.81	0.32	4.46	7.02	0.85	0.34	4.29	7.15	0.84	0.33	4.67	6.57	0.8	0.31	4.48	7.1	1.01	0.34	4.29	6.97	0.58	0.3	5.29	5.88	0.59	0.28	4.51	6.76	0.63	0.32	4.32	7.01	0.67	0.3
DCPD327	-39.2346	175.551	1600.45	2.76947e+06	207588	0.998551	2.22481	3.51733	0	3.1	7.49	0.83	0.49	3.37	7.15	0.96	0.51	3.23	7.44	0.99	0.52	3.12	7.55	0.97	0.5	3.39	6.96	0.95	0.49	3.25	7.52	1.17	0.53	3.06	7.51	0.73	0.46	3.71	6.44	0.73	0.44	3.19	7.35	0.8	0.49	3.08	7.57	0.82	0.47
DCPD329	-39.2342	175.551	1591.8	3.0105e+06	225803	0.998551	2.36527	4.33924	0	3.11	8.18	0.94	0.56	3.35	7.87	1.12	0.59	3.23	8.17	1.16	0.61	3.13	8.25	1.1	0.57	3.37	7.67	1.1	0.57	3.24	8.26	1.35	0.62	3.07	8.18	0.84	0.54	3.71	7.05	0.87	0.53	3.19	8.05	0.95	0.58	3.1	8.24	0.94	0.55
DCPD330	-39.2341	175.551	1590.27	2.8335e+06	215657	0.998551	2.21472	3.38597	0	3.09	7.69	0.87	0.52	3.35	7.35	1.01	0.54	3.22	7.65	1.04	0.55	3.11	7.75	1.01	0.53	3.36	7.17	0.99	0.52	3.24	7.73	1.23	0.56	3.05	7.71	0.76	0.5	3.69	6.62	0.78	0.47	3.18	7.53	0.83	0.52	3.07	7.76	0.86	0.5
[truncated: 8 more columns]
