# Supplementary figures and images for: Cosmogenic 3 He chronology of postglacial lava flows at Mt. Ruapehu, New Zealand
Source: Copernicus journal article supplement (doi:10.5194/egusphere-2024-163), 2024-01-23

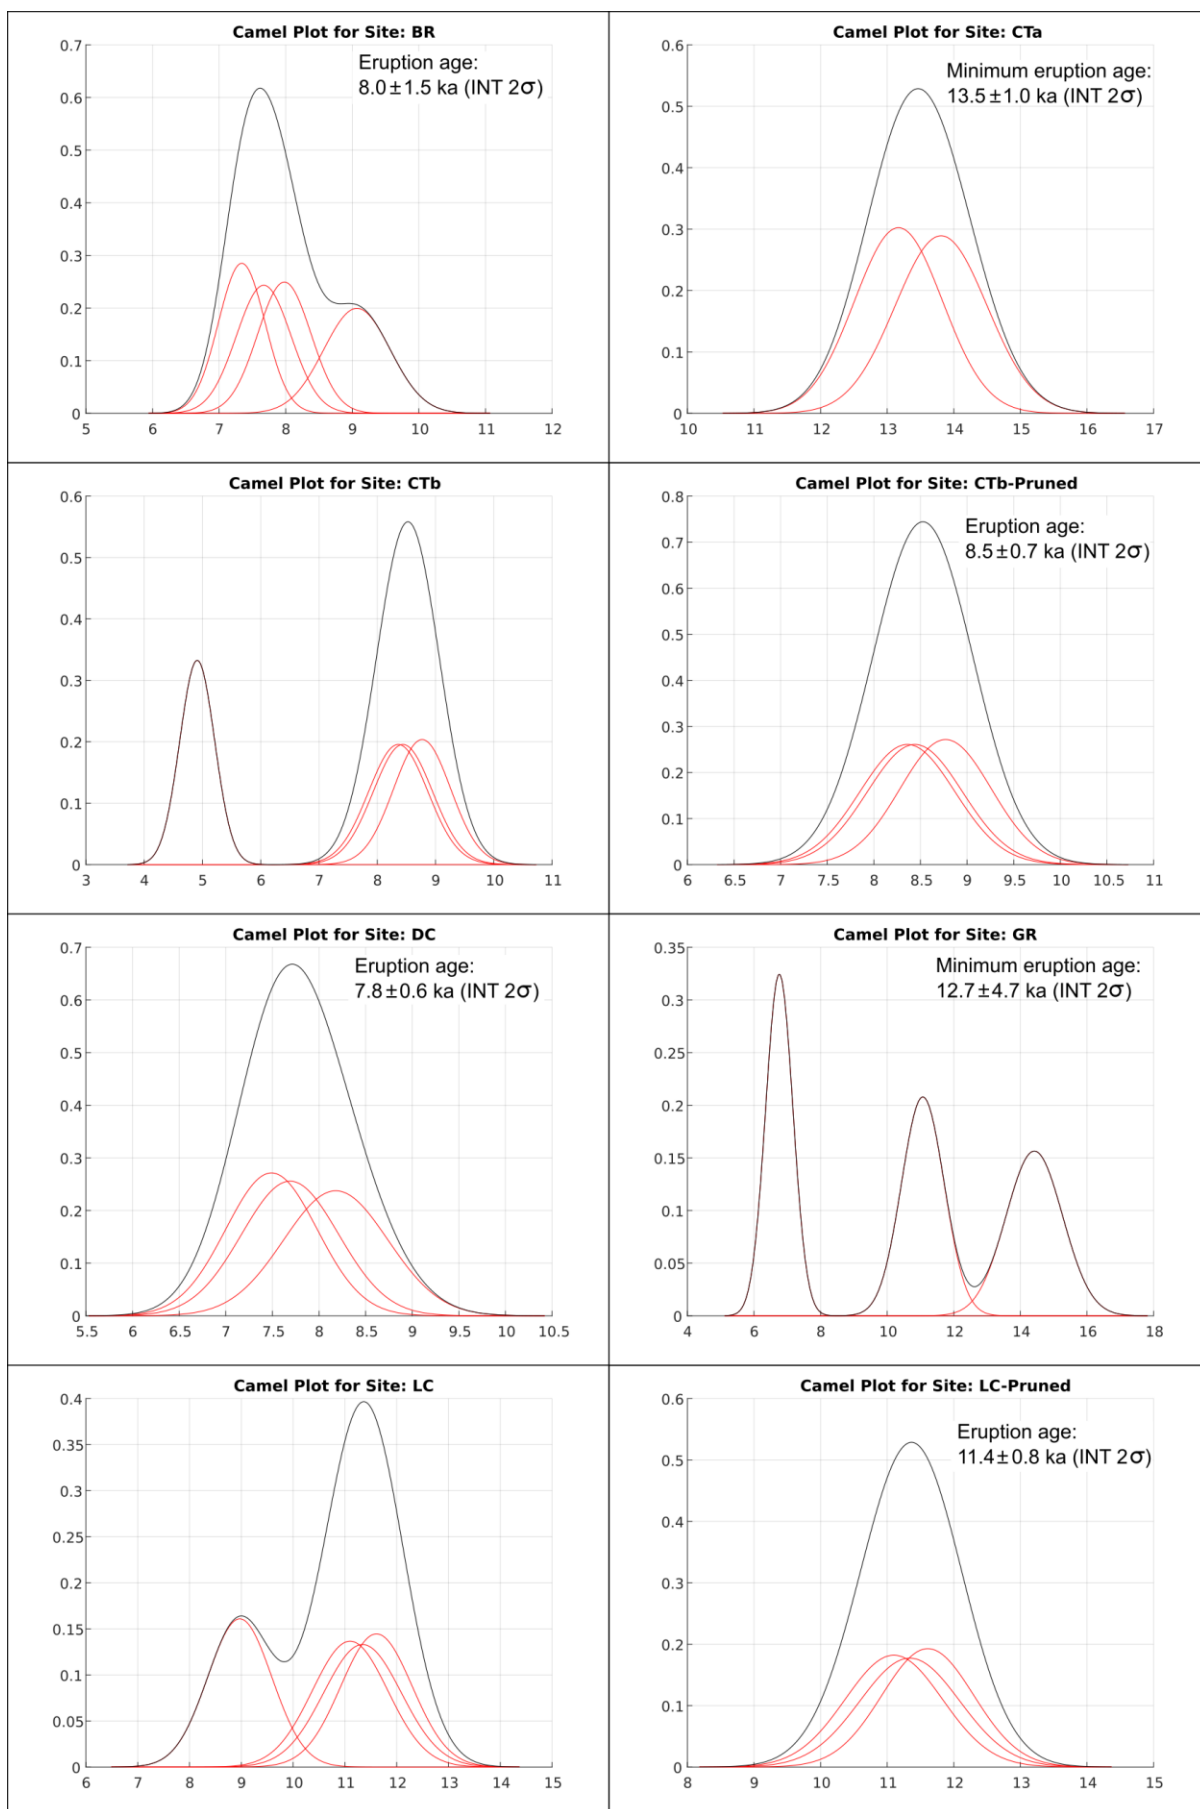

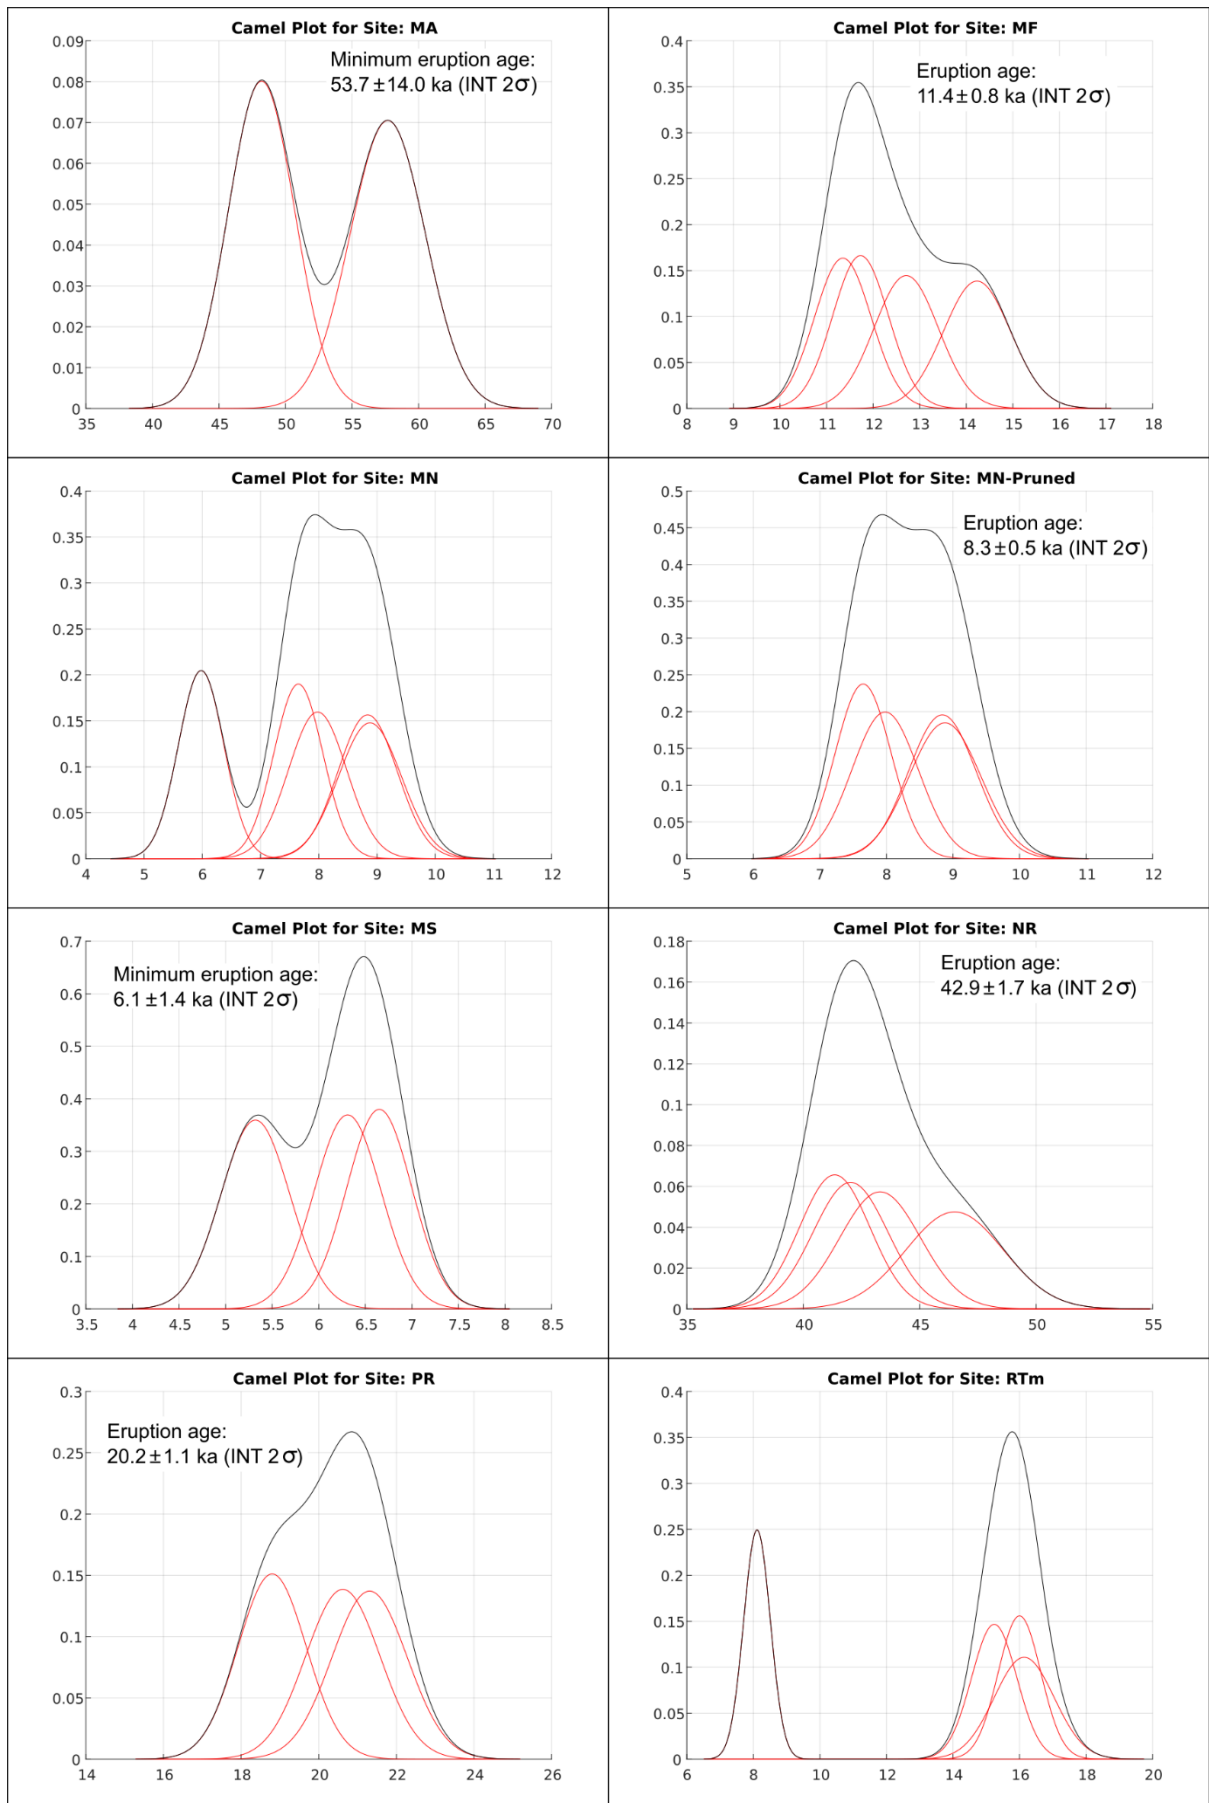

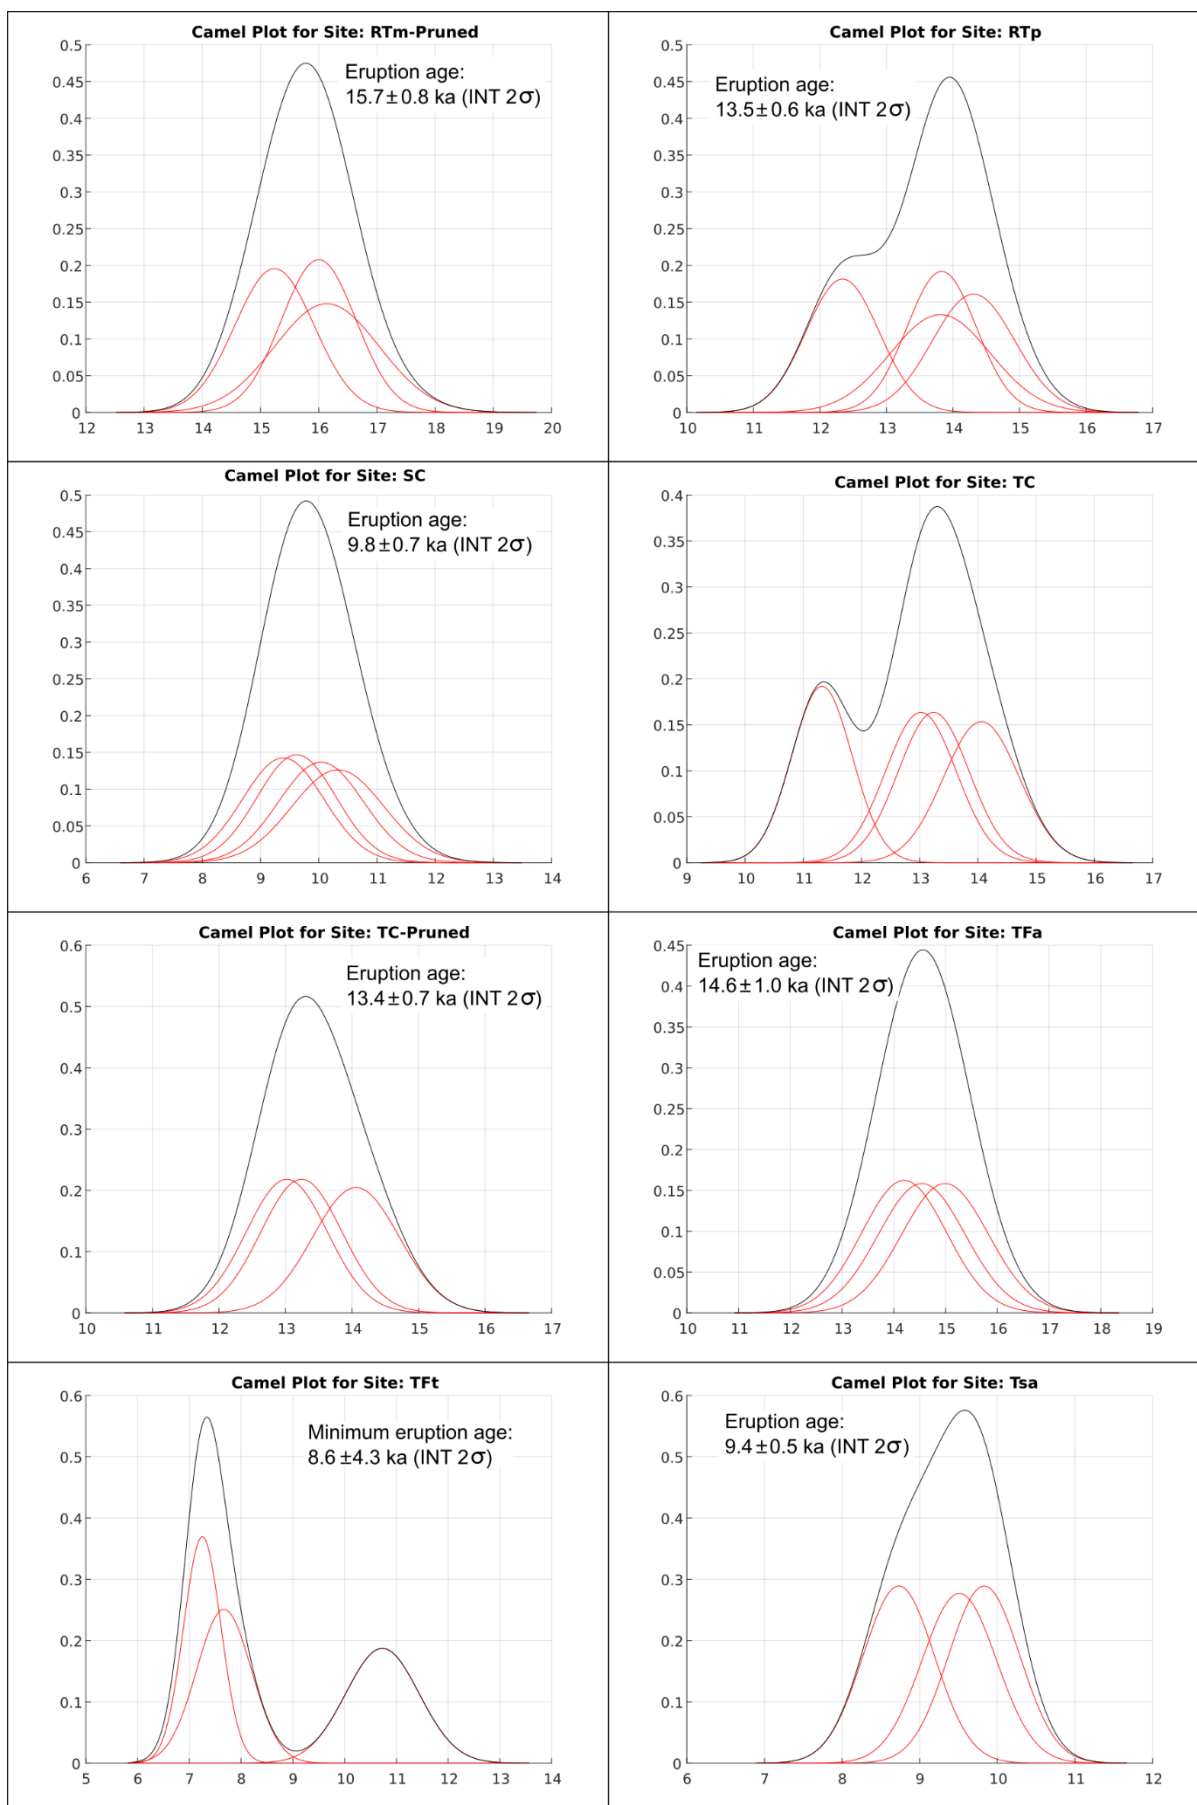

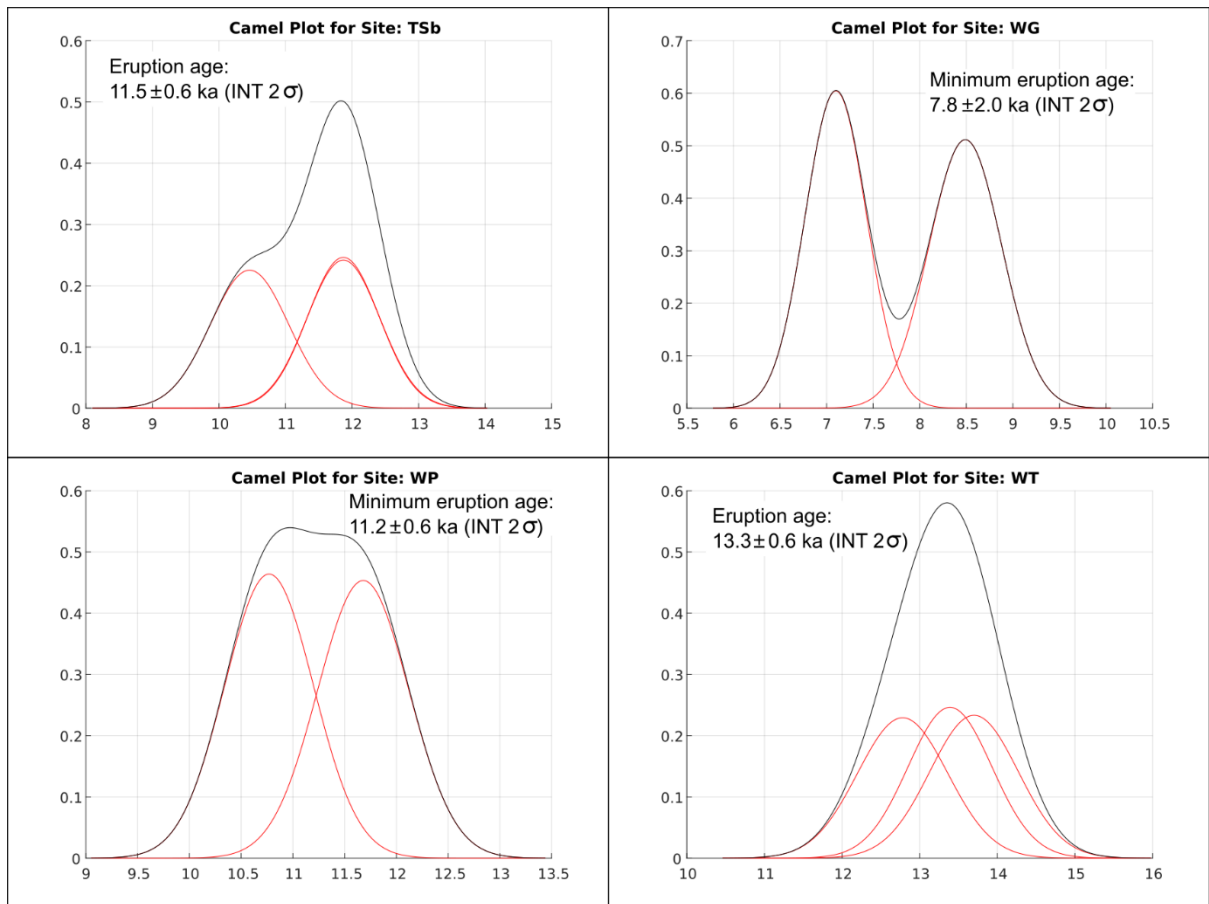

Supplement: Supplementary file 1 [file egusphere-2024-163-supplement.zip]
